# Supplementary material
Source: PubMed Central journal article supplement (PMC3286273)

SUPPLEMENTARY DATA

FIG. S1. Chromosome number evolution in Araceae inferred under Bayesian optimization, with phylogenetically informed coding and outgroups excluded (coding scheme A6 in Table 2 of the main text). Pie charts at nodes and tips represent the probabilities of the inferred chromosome number(s); numbers inside charts have the highest probability. The numbers at tips are the input chromosome numbers used in the ‘phylogenetically informed’ coding scheme (see Materials and Methods). Numbers above branches represent the inferred frequency of those of the four possible events (gains, losses, duplications, demi-duplications) that had a posterior probability >0.5. The colour-coding of chromosome numbers and the four events is explained in the insets.

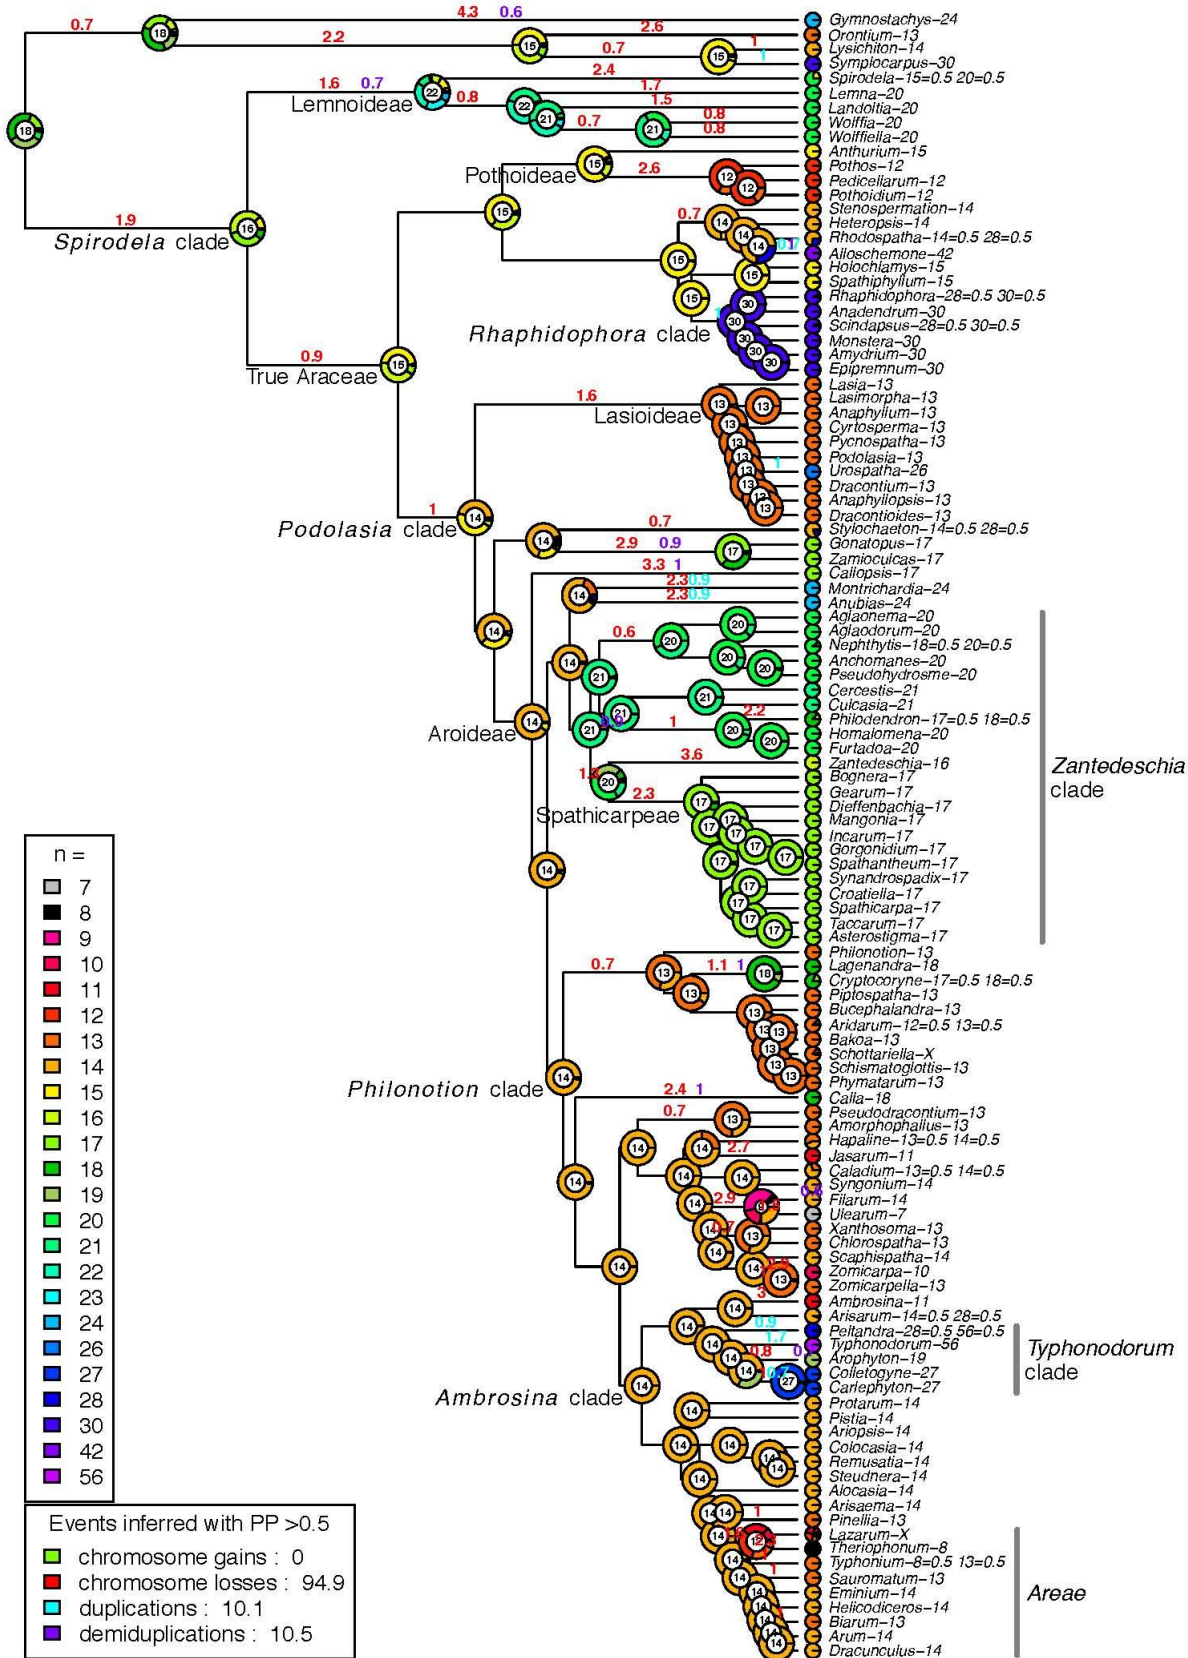

FIG. S2. Chromosome number evolution in Araceae inferred under maximum likelihood optimization, with phylogenetically informed coding and outgroups excluded (analysis A6 in Table 2).

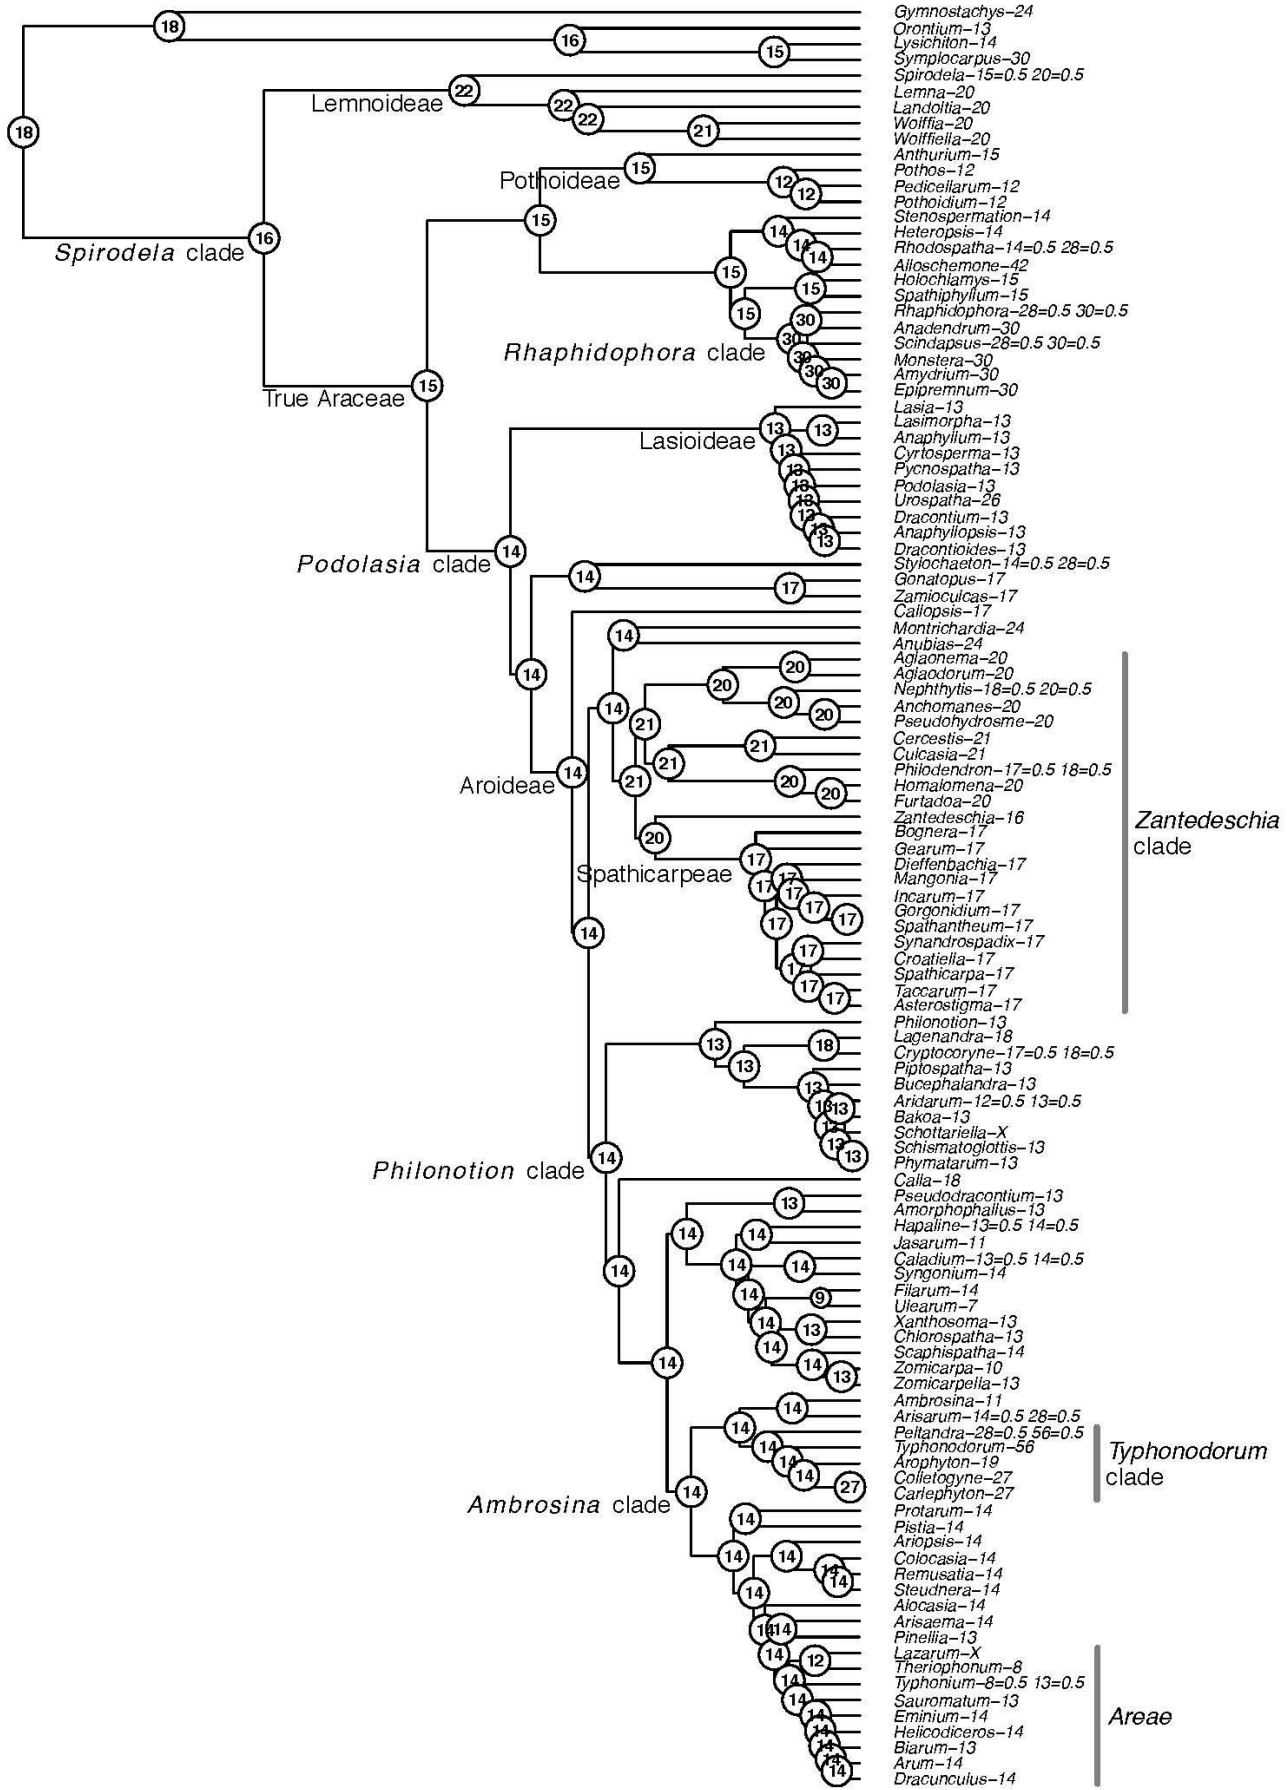

Supplement: supp_mcr302_mcr302supp_figs.pdf [file supp_mcr302_mcr302supp_figs.pdf]
