# Supplementary material
Source: PubMed Central journal article supplement (PMC3286273)
Supplement: supp_mcr302_mcr302supp_table.pdf [file supp_mcr302_mcr302supp_table.pdf]

## SUPPLEMENTARY DATA

TABLE S1. Chromosome counts for species of Araceae with references, including the four new counts reported in the present paper. Where a species' name has been changed due to taxonomic revision, the name under which the number was originally published is given in brackets.

| Species                                                                         | <i>n</i>       | <i>2n</i> | References                              |
|---------------------------------------------------------------------------------|----------------|-----------|-----------------------------------------|
| <i>Aglaodorum griffithii</i>                                                    |                | 40        | Petersen, 1989                          |
| <i>Aglaonema commutatum</i>                                                     |                | 14        | Subramanian & Munian, 1988              |
| <i>Aglaonema modestum</i>                                                       | 20 II<br>+ 20I |           | Srivastava, 1982                        |
| <i>Aglaonema oblongifolium</i>                                                  |                | 40        | Marchant, 1971a                         |
| <i>Aglaonema pictum</i>                                                         |                | 40        | Okada, 1982                             |
| <i>Aglaonema simplex</i>                                                        |                | 40        | Marchant, 1971a                         |
| <i>Aglaonema treubii</i>                                                        |                | 100       | Marchant, 1971a                         |
| <i>Alloschemone occidentalis</i>                                                |                | 84        | Bogner & Petersen, 2007                 |
| <i>Alocasia acuminata</i>                                                       |                | 28        | Mehra & Sachdeva 1979<br>Petersen, 1989 |
| <i>Alocasia alba</i> ( <i>Alocasia crassifolia</i> )                            |                | 28        | Okada, 1982<br>Petersen, 1989           |
| <i>Alocasia argyrea</i> not accepted                                            |                | 56        | Sharma, 1970                            |
| <i>Alocasia brancifolia</i>                                                     |                | 28        | Petersen, 1989                          |
| <i>Alocasia cucullata</i>                                                       |                | 28        | Ankei, 1987; Petersen, 1989             |
| <i>Alocasia cuprea</i>                                                          | 14             | 28        | Petersen, 1989                          |
| <i>Alocasia decipiens</i>                                                       |                | 24, 28    | Bhattacharya, 1974<br>Petersen, 1989    |
| <i>Alocasia fornicata</i>                                                       | 14             | 28, 42    | Ramachandran, 1978<br>Petersen, 1989    |
| <i>Alocasia lauterbachiana</i> ( <i>Xenophya lauterbachiana</i> )               |                | 28        | Petersen, 1989                          |
| <i>Alocasia lauterbachiana</i> ( <i>Alocasia wavriniiana</i> )                  |                | 28        | Marchant, 1971a                         |
| <i>Alocasia longiloba</i>                                                       |                | 28, 56    | Sharma, 1970<br>Marchant, 1971a         |
| <i>Alocasia longiloba</i> var. <i>denudata</i> ( <i>Alocasia denudata</i> )     |                | 28        | Marchant, 1971a                         |
| <i>Alocasia longiloba</i> var. <i>korthalsii</i> ( <i>Alocasia korthalsii</i> ) |                | 28        | Petersen, 1989                          |
| <i>Alocasia longiloba</i> var. <i>lowii</i> ( <i>Alocasia lowii</i> )           |                | 28, 40    | Bhattacharya, 1974<br>Petersen, 1989    |
| <i>Alocasia longiloba</i> var. <i>putzeysii</i> ( <i>Alocasia putzeysii</i> )   |                | 70, 84    | Petersen, 1989                          |
| <i>Alocasia longiloba</i> var. <i>thibautiana</i> ( <i>Alocasia</i>             |                | 28        | Sharma, 1970                            |

|                                                            |    |         |                                                            |
|------------------------------------------------------------|----|---------|------------------------------------------------------------|
| <i>thibautiana</i> )                                       |    |         |                                                            |
| <i>Alocasia macrorrhiza</i>                                |    | 26, 28  | Sharma, 1970<br>Petersen, 1989                             |
| <i>Alocasia macrorrhizos</i><br>( <i>Alocasia indica</i> ) | 21 | 28, 42  | Ramachandran, 1978<br>Bhattacharya, 1974<br>Petersen, 1989 |
| <i>Alocasia microlitziana</i>                              |    | 28      | Petersen, 1989                                             |
| <i>Alocasia Montana</i> not<br>accepted                    |    | 28      | Ramachandran, 1978                                         |
| <i>Alocasia navicularis</i>                                |    | 28, 68  | Sharma, 1970<br>Petersen, 1989                             |
| <i>Alocasia odora</i>                                      |    | 28, 56  | Nguyen et al., 1998<br>Petersen, 1989                      |
| <i>Alocasia putii</i>                                      |    | 28      | Sharma, 1970                                               |
| <i>Alocasia regina</i>                                     |    | 28      | Sharma, 1970                                               |
| <i>Alocasia sanderiana</i>                                 | 14 |         | Petersen, 1989                                             |
| <i>Alocasia zebrina</i>                                    |    | 28, 42  | Sharma, 1970; Bhattacharya, 1974                           |
| <i>Ambrosina bassii</i>                                    |    | 22      | Petersen, 1989                                             |
| <i>Amorphophallus</i><br><i>abyssinicus</i>                |    | 26      | Chauhan & Brandham, 1985                                   |
| <i>Amorphophallus albus</i>                                |    | 26      | Liu et al., 1985                                           |
| <i>Amorphophallus ankarana</i>                             |    | 26      | Hettterscheid et al., 1999                                 |
| <i>Amorphophallus</i><br><i>asterostigmatus</i>            |    | 26      | Petersen, 1992                                             |
| <i>Amorphophallus</i><br><i>bannanensis</i>                |    | 26      | Gu et al., 1992                                            |
| <i>Amorphophallus bulbifer</i>                             |    | 26, 39  | Chauhan & Brandham, 1985<br>Kuruvilla et al., 1989         |
| <i>Amorphophallus</i><br><i>campanulatus</i>               | 14 | 26, 28  | Sharma, 1970<br>Chaudhuri & Sharma, 1979                   |
| <i>Amorphophallus</i><br><i>commutatus</i>                 |    | 26      | Chauhan & Brandham, 1985                                   |
| <i>Amorphophallus dixenii</i>                              |    | 28      | Larsen & Larsen, 1974                                      |
| <i>Amorphophallus</i><br><i>dracontioides</i>              |    | 26      | Chauhan & Brandham, 1985                                   |
| <i>Amorphophallus dubius</i>                               |    | 28      | Chauhan & Brandham, 1985                                   |
| <i>Amorphophallus dunnii</i>                               |    | 26      | Zheng & Liu, 1989                                          |
| <i>Amorphophallus eichleri</i>                             |    | 26 (56) | Petersen, 1989                                             |
| <i>Amorphophallus</i><br><i>gallaënsis</i>                 |    | 26      | Petersen, 1989                                             |
| <i>Amorphophallus</i><br><i>giganteus</i>                  |    | 39      | Petersen, 1989                                             |
| <i>Amorphophallus goetzii</i>                              |    | 26      | Chauhan & Brandham, 1985                                   |
| <i>Amorphophallus</i><br><i>gombocziamus</i>               |    | 26      | Marchant, 1971b                                            |
| <i>Amorphophallus</i><br><i>hildebrandtii</i>              |    | 26      | Chauhan & Brandham, 1985                                   |
| <i>Amorphophallus hirtus</i>                               |    | 26      | Petersen, 1989                                             |
| <i>Amorphophallus</i><br><i>hohenackeri</i>                |    | 26      | Petersen, 1989                                             |

|                                      |    |             |                                            |
|--------------------------------------|----|-------------|--------------------------------------------|
| <i>Amorphophallus johnsonii</i>      |    | 26          | Chauhan & Brandham, 1985                   |
| <i>Amorphophallus kerrii</i>         |    | 26          | Chauhan & Brandham, 1985                   |
| <i>Amorphophallus konjac</i>         |    | 26, 39      | Ishida & Akagi, 2000<br>Petersen, 1989     |
| <i>Amorphophallus konkanensis</i>    |    | 26          | Patil & Dixit, 1995                        |
| <i>Amorphophallus lambii</i>         |    | 26          | Chauhan & Brandham, 1985                   |
| <i>Amorphophallus laxiflorus</i>     |    | 26          | Chauhan & Brandham, 1985                   |
| <i>Amorphophallus linumaana</i>      |    | 26          | Petersen, 1989                             |
| <i>Amorphophallus longituberosus</i> |    | 28 (56)     | Petersen, 1989                             |
| <i>Amorphophallus maculatus</i>      |    | 26          | Petersen, 1989                             |
| <i>Amorphophallus mairei</i>         |    | 26          | Zheng & Liu, 1989                          |
| <i>Amorphophallus margaritifera</i>  |    | 26          | De Sarker & Hettterscheid, 1997            |
| <i>Amorphophallus maximus</i>        |    | 26          | Petersen, 1989                             |
| <i>Amorphophallus napalensis</i>     |    | 28          | Petersen, 1989                             |
| <i>Amorphophallus oncophyllus</i>    |    | 39          | Chauhan & Brandham, 1985                   |
| <i>Amorphophallus paeoniifolius</i>  | 14 | 26, 28      | Chauhan & Brandham, 1985<br>Petersen, 1989 |
| <i>Amorphophallus palawanensis</i>   |    | 26          | Petersen, 1992                             |
| <i>Amorphophallus prainii</i>        |    | 28          | Chauhan & Brandham, 1985                   |
| <i>Amorphophallus rivieri</i>        |    | 26          | Zheng & Liu 1989                           |
| <i>Amorphophallus siamensis</i>      |    | 26          | Petersen, 1989                             |
| <i>Amorphophallus sinensis</i>       |    | 26          | Sun, 1999                                  |
| <i>Amorphophallus sumawongii</i>     |    | 26          | Petersen, 1989                             |
| <i>Amorphophallus sutepensis</i>     |    | 26          | Chauhan & Brandham, 1985                   |
| <i>Amorphophallus sylvaticus</i>     |    | 26          | Petersen, 1989                             |
| <i>Amorphophallus taurostigma</i>    |    | 26          | Hettterscheid et al., 1999                 |
| <i>Amorphophallus thomsonii</i>      |    | 26 (24, 25) | Petersen, 1989                             |
| <i>Amorphophallus titanum</i>        | 13 | 26          | Giordano, C. 1999<br>Petersen, 1989        |
| <i>Amorphophallus variabilis</i>     | 13 | 26          | Chauhan & Brandham, 1985<br>Petersen, 1989 |
| <i>Amydrium humile</i>               |    | 60          | Petersen, 1989                             |
| <i>Amydrium medium</i>               |    | 60          | Petersen, 1989                             |
| <i>Anadendrum marginatum</i>         |    | 60          | Petersen, 1989                             |
| <i>Anadendrum</i>                    |    | 60          | Petersen, 1989                             |

|                                          |           |                                                                                  |
|------------------------------------------|-----------|----------------------------------------------------------------------------------|
| <i>microstachyum</i>                     |           |                                                                                  |
| <i>Anadendrum montanum</i>               |           | 60 Petersen, 1989                                                                |
| <i>Anaphyllopsis americana</i>           |           | 26 Petersen, 1989                                                                |
| <i>Anaphyllum beddomei</i>               |           | Ca. 26 Petersen, 1989                                                            |
| <i>Anaphyllum wightii</i>                | 13        | 26 Ramachandran, 1978<br>Petersen, 1989                                          |
| <i>Anaphyllum wightii ssp. revolutum</i> |           | 26 Petersen, 1989                                                                |
| <i>Anchomanes abbreviatus</i>            |           | 40 Petersen, 1989                                                                |
| <i>Anchomanes difformis</i>              |           | 40 Petersen, 1989                                                                |
| <i>Anchomanes welwitchii</i>             |           | 40 Marchant, 1971a                                                               |
| <i>Anthurium acaule</i>                  | 15        | 30 + Sharma, 1970<br>2B, 0- Bhattacharya, 1976<br>2B or Vij et al., 1982<br>2-5B |
| <i>Anthurium acussatum</i>               | c. 15     | c. 30 Petersen, 1989                                                             |
| <i>Anthurium acutangulum</i>             | c. 15     | 30 Sheffer & Croat, 1983<br>Petersen, 1989                                       |
| <i>Anthurium acutum</i>                  |           | 30 Petersen, 1989                                                                |
| <i>Anthurium aemulum</i>                 |           | 30, 60 Sheffer & Kamemoto, 1976                                                  |
| <i>Anthurium affine</i>                  |           | 30 Carvalheira et al., 1991                                                      |
| <i>Anthurium allenii</i>                 |           | 30 Sheffer & Kamemoto, 1976                                                      |
| <i>Anthurium amnicola</i>                |           | 30 Marutani et al., 1988                                                         |
| <i>Anthurium andicola</i>                |           | 30 Sheffer & Croat, 1983                                                         |
| <i>Anthurium andraeanum</i>              | c. 15, 16 | 30, 32 Sheffer & Croat, 1983<br>Petersen, 1989                                   |
| <i>Anthurium angustispadix</i>           |           | 30 Sheffer & Croat, 1983                                                         |
| <i>Anthurium antioquiense</i>            |           | 30 Sheffer & Croat, 1983                                                         |
| <i>Anthurium armenienne</i>              |           | 30 Sheffer & Croat, 1983                                                         |
| <i>Anthurium aureum</i>                  |           | 30, 31 Sheffer & Kamemoto, 1976                                                  |
| <i>Anthurium baileyi</i>                 |           | 60 Sheffer & Kamemoto, 1976                                                      |
| <i>Anthurium bakeri</i>                  | 15        | 30 Sheffer & Croat, 1983<br>Petersen, 1989                                       |
| <i>Anthurium bellum</i>                  |           | 28, 56 Bhattacharya, 1976<br>Vij et al., 1982<br>Petersen, 1989                  |
| <i>Anthurium beltianum</i>               |           | 30 Sheffer & Croat, 1983                                                         |
| <i>Anthurium berriozabalense</i>         |           | 30 Sheffer & Croat, 1983                                                         |
| <i>Anthurium bicollectivum</i>           |           | 28, 30 Sheffer & Croat, 1983                                                     |
| <i>Anthurium boucheanum</i>              |           | 56 Petersen, 1989                                                                |
| <i>Anthurium brenesii</i>                |           | 30 Sheffer & Croat, 1983                                                         |
| <i>Anthurium bristanii</i>               |           | 30 Petersen, 1989                                                                |
| <i>Anthurium brittonianum</i>            |           | 30 Sheffer & Croat, 1983                                                         |
| <i>Anthurium brownii</i>                 |           | 30 Sheffer & Croat, 1983                                                         |
| <i>Anthurium caperatum</i>               |           | 30 Marutani et al. 1993                                                          |
| <i>Anthurium cerrobaulense</i>           |           | 30 Sheffer & Croat, 1983                                                         |
| <i>Anthurium cerrocampanense</i>         |           | 30, 30 Sheffer & Croat, 1983                                                     |
| <i>Anthurium chamulense</i>              |           | + 2B Marutani et al., 1993<br>30 Sheffer & Croat, 1983                           |

|                                  |       |               |                                                                                                      |
|----------------------------------|-------|---------------|------------------------------------------------------------------------------------------------------|
| <i>Anthurium chiriquense</i>     |       | 30            | Sheffer & Kamemoto, 1976                                                                             |
| <i>Anthurium circinatum</i>      |       | 30            | Sheffer & Croat, 1983                                                                                |
| <i>Anthurium clarinervium</i>    | 15    | 30            | Sheffer & Croat, 1983<br>Sheffer and Croat, 1983                                                     |
| <i>Anthurium clavatum</i>        |       | 30            | Sheffer & Croat, 1983                                                                                |
| <i>Anthurium clavigerum</i>      |       | 30            | Petersen, 1989                                                                                       |
| <i>Anthurium clidemioides</i>    |       | 30            | Petersen, 1989                                                                                       |
| <i>Anthurium colonicum</i>       |       | 30            | Sheffer & Croat, 1983                                                                                |
| <i>Anthurium comtum</i>          | 15    | c. 30         | Petersen, 1989                                                                                       |
| <i>Anthurium concinnatum</i>     |       | 30            | Sheffer & Kamemoto, 1976                                                                             |
| <i>Anthurium concolor</i>        |       | 30            | Sheffer & Croat, 1983                                                                                |
| <i>Anthurium consobrinum</i>     | 15    | 30            | Sheffer & Croat, 1983<br>Petersen, 1989                                                              |
| <i>Anthurium cordatum</i>        | c. 15 | c. 30         | Petersen, 1989<br>Sheffer & Croat, 1983                                                              |
| <i>Anthurium cotobrusii</i>      |       | 60            | Sheffer & Croat, 1983                                                                                |
| <i>Anthurium crassinervium</i>   | c. 30 | 60            | Sheffer & Croat, 1983<br>Petersen, 1989                                                              |
| <i>Anthurium crassiradicans</i>  |       | 30            | Petersen, 1989                                                                                       |
| <i>Anthurium crenatum</i>        | 15    | 30            | Petersen, 1989                                                                                       |
| <i>Anthurium crystallinum</i>    | 15    | 30 + 0-<br>3B | Bhattacharya, 1976<br>Vij et al., 1982<br>Sharma, 1970                                               |
| <i>Anthurium cubense</i>         | c. 15 | 30            | Sheffer & Croat, 1983<br>Petersen, 1989                                                              |
| <i>Anthurium cucullispathum</i>  |       | 30            | Sheffer & Croat, 1983                                                                                |
| <i>Anthurium curvilaminum</i>    |       | 30            | Sheffer & Croat, 1983                                                                                |
| <i>Anthurium cuspidatum</i>      |       | 30            | Sheffer & Croat, 1983                                                                                |
| <i>Anthurium denudatum</i>       | c. 15 | 30            | Sheffer & Kamemoto, 1976<br>Petersen, 1989                                                           |
| <i>Anthurium digitatum</i>       | 30    | 26, 30,<br>36 | Sheffer & Kamemoto, 1976<br>Bhattacharya, 1976<br>Vij et al., 1982<br>Sharma, 1970<br>Petersen, 1989 |
| <i>Anthurium dominicense</i>     | 15    | c. 30         | Petersen, 1989                                                                                       |
| <i>Anthurium durandii</i>        | 15    | c. 30         | Petersen, 1989                                                                                       |
| <i>Anthurium ellipticum</i>      |       | 30            | Sheffer & Kamemoto, 1976                                                                             |
| <i>Anthurium fatoense</i>        |       | Ca. 30        | Sheffer & Croat, 1983                                                                                |
| <i>Anthurium flavoviride</i>     |       | 30            | Sheffer & Kamemoto, 1976                                                                             |
| <i>Anthurium flexile</i>         |       | 60            | Sheffer & Croat, 1983                                                                                |
| <i>Anthurium folsonii</i>        |       | 30            | Petersen, 1989                                                                                       |
| <i>Anthurium forgetii</i>        | 15    | 30 + Bs       | Sheffer & Kamemoto, 1976<br>Petersen, 1989<br>Sheffer & Croat, 1983                                  |
| <i>Anthurium formosum</i>        |       | 30            | Marutani et al., 1993                                                                                |
| <i>Anthurium friedrichsthali</i> | 15    | 30            | Sheffer & Kamemoto, 1976<br>Petersen, 1989                                                           |
| <i>Anthurium garagaranum</i>     |       | 30 + 0-<br>1B | Marutani et al., 1993                                                                                |

|                                  |       |                          |                                                                                     |
|----------------------------------|-------|--------------------------|-------------------------------------------------------------------------------------|
| <i>Anthurium gladiifolium</i>    |       | 30                       | Sheffer & Kamemoto, 1976                                                            |
| <i>Anthurium gracile</i>         |       | 20, 30,<br>40, 49,<br>60 | Sheffer & Croat, 1983<br>Guerra, 1986<br>Sheffer & Kamemoto, 1976<br>Petersen, 1989 |
| <i>Anthurium grande</i>          |       | 28, 30                   | Sheffer & Kamemoto, 1976<br>Sharma, 1970                                            |
| <i>Anthurium grandifolium</i>    |       | 30                       | Sheffer & Kamemoto, 1976                                                            |
| <i>Anthurium gustavii</i>        |       | 30                       | Sheffer & Kamemoto, 1976                                                            |
| <i>Anthurium gymnopus</i>        |       | 30                       | Petersen, 1989                                                                      |
| <i>Anthurium hacumense</i>       |       | 30                       | Sheffer & Croat, 1983                                                               |
| <i>Anthurium harrisii</i>        |       | 28 +<br>2B, 30           | Bhattacharya, 1976<br>Vij et al., 1982<br>Petersen, 1989                            |
| <i>Anthurium hoffmannii</i>      |       | 30                       | Sheffer & Kamemoto, 1976                                                            |
| <i>Anthurium hookeri</i>         | 15    | 30, 60                   | Sheffer & Kamemoto, 1976<br>Petersen, 1989                                          |
| <i>Anthurium hornitense</i>      |       | 30                       | Sheffer & Croat, 1983                                                               |
| <i>Anthurium huixtlense</i>      |       | 30                       | Sheffer & Croat, 1983                                                               |
| <i>Anthurium hutchisonii</i>     |       | 30                       | Sheffer & Croat, 1983                                                               |
| <i>Anthurium imperiale</i>       |       | 30 + f,<br>60            | Marchant, 1973<br>Petersen, 1989                                                    |
| <i>Anthurium jenmanii</i>        |       | 48                       | Sheffer & Croat, 1983                                                               |
| <i>Anthurium joseanum</i>        |       | 30                       | Sheffer & Kamemoto, 1976                                                            |
| <i>Anthurium kamemotoanum</i>    |       | 30                       | Marutani et al., 1993                                                               |
| <i>Anthurium lancifolium</i>     |       | 30                       | Sheffer & Croat, 1983                                                               |
| <i>Anthurium lentii</i>          |       | 30                       | Sheffer & Croat, 1983                                                               |
| <i>Anthurium leuconeurum</i>     |       | 35                       | Sheffer & Croat, 1983                                                               |
| <i>Anthurium lezamae</i>         |       | 30                       | Sheffer & Croat, 1983                                                               |
| <i>Anthurium lindenianum</i>     |       | 30                       | Marutani et al., 1993                                                               |
| <i>Anthurium lindenianum</i>     |       | 30                       | Sheffer & Kamemoto, 1976                                                            |
| <i>Anthurium littorale</i>       |       | 28                       | Sheffer & Kamemoto, 1976                                                            |
| <i>Anthurium longipeltatum</i>   |       | 30                       | Sheffer & Croat, 1983                                                               |
| <i>Anthurium longistipitatum</i> |       | 30                       | Sheffer & Croat, 1983                                                               |
| <i>Anthurium lucens</i>          |       | 30, 66                   | Sheffer & Croat, 1983                                                               |
| <i>Anthurium lucidum</i>         |       | c. 124                   | Petersen, 1989                                                                      |
| <i>Anthurium luteynii</i>        |       | 30                       | Sheffer & Croat, 1983                                                               |
| <i>Anthurium magnificum</i>      | c. 15 | 30, 60                   | Sheffer & Croat, 1983<br>Sheffer & Kamemoto, 1976<br>Petersen, 1989                 |
| <i>Anthurium maximum</i>         | c. 15 | c. 30                    | Petersen, 1989                                                                      |
| <i>Anthurium mexicanum</i>       |       | 60                       | Sheffer & Kamemoto, 1976                                                            |
| <i>Anthurium michelii</i>        |       | 30                       | Sheffer & Croat, 1983                                                               |
| <i>Anthurium micromystrium</i>   |       | 30                       | Sheffer & Kamemoto, 1976                                                            |
| <i>Anthurium microphyllum</i>    |       | 30 + B                   | Petersen, 1989                                                                      |
| <i>Anthurium microspadix</i>     |       | c. 30,<br>60             | Sheffer & Croat, 1983<br>Petersen, 1989                                             |
| <i>Anthurium montanum</i>        |       | 30                       | Sheffer & Croat, 1983                                                               |
| <i>Anthurium nervatum</i>        |       | 30                       | Sheffer & Croat, 1983                                                               |

|                                         |        |                   |                                                                 |
|-----------------------------------------|--------|-------------------|-----------------------------------------------------------------|
| <i>Anthurium<br/>nymphaeifolium</i>     |        | 28, 30            | Marutani et al., 1993<br>Bhattacharya, 1976<br>Vij et al., 1982 |
| <i>Anthurium obtusilobum</i>            |        | 30                | Sheffer & Croat, 1983                                           |
| <i>Anthurium ochranthum</i>             |        | 30 + 2B           | Marutani et al., 1993                                           |
| <i>Anthurium oerstedianum</i>           |        | 30                | Sheffer & Croat, 1983                                           |
| <i>Anthurium olfersianum</i>            | c. 15  | 30 + B            | Petersen, 1989<br>Sheffer & Croat, 1983                         |
| <i>Anthurium ovandense</i>              |        | 30                | Sheffer & Croat, 1983                                           |
| <i>Anthurium paludosum</i>              |        | 30                | Petersen, 1989                                                  |
| <i>Anthurium papillaminum</i>           |        | 30                | Petersen, 1989                                                  |
| <i>Anthurium paraguayense</i>           |        | 60                | Fernandez, A. 1977                                              |
| <i>Anthurium patulum</i>                | 14     | 28 + B            | Petersen, 1989<br>Sheffer & Croat, 1983                         |
| <i>Anthurium<br/>pedatoradiatum</i>     | c. 15  | c. 30             | Petersen, 1989                                                  |
| <i>Anthurium pentaphyllum</i>           | 15     | 60                | Sheffer & Kamemoto, 1976<br>Petersen, 1989                      |
| <i>Anthurium pichincae</i>              |        | 30                | Sheffer & Kamemoto, 1976                                        |
| <i>Anthurium pittieri</i>               |        | 30                | Sheffer & Croat, 1983                                           |
| <i>Anthurium pluricostatum</i>          |        | 30                | Sheffer & Croat, 1983                                           |
| <i>Anthurium podophyllum</i>            | 15     | 30                | Bhattacharya, 1976<br>Vij et al., 1982                          |
| <i>Anthurium procerum</i>               |        | 30                | Sheffer & Kamemoto, 1976                                        |
| <i>Anthurium<br/>pseudospectabile</i>   |        | 30                | Sheffer & Croat, 1983                                           |
| <i>Anthurium pulchellum</i>             |        | 63                | Petersen, 1989                                                  |
| <i>Anthurium<br/>purpureospathum</i>    |        | 30                | Sheffer & Croat, 1983                                           |
| <i>Anthurium radicans</i>               | 15     | 30                | Sheffer & Croat, 1983<br>Petersen, 1989                         |
| <i>Anthurium ramonense</i>              |        | 30                | Sheffer & Croat, 1983                                           |
| <i>Anthurium ranchoanum</i>             |        | 30                | Sheffer & Kamemoto, 1976                                        |
| <i>Anthurium ravenii</i>                |        | 30                | Sheffer & Croat, 1983                                           |
| <i>Anthurium regale</i>                 |        | 30 + 1B           | Sheffer & Kamemoto, 1976                                        |
| <i>Anthurium rhodostachyum</i>          |        | 28, 29,<br>30, 31 | Sheffer & Kamemoto, 1976                                        |
| <i>Anthurium roraimense</i>             |        | 30                | Sheffer & Kamemoto, 1976                                        |
| <i>Anthurium roseospadix</i>            |        | 30                | Marutani et al., 1993                                           |
| <i>Anthurium rzedowskii</i>             |        | 30                | Sheffer & Croat, 1983                                           |
| <i>Anthurium sagawanae</i>              |        | 30                | Sheffer & Croat, 1983                                           |
| <i>Anthurium salvadorensense</i>        |        | 30                | Sheffer & Croat, 1983                                           |
| <i>Anthurium salviniae</i>              |        | 30                | Sheffer & Croat, 1983                                           |
| <i>Anthurium sanctifidense</i>          |        | 30                | Marutani et al., 1993                                           |
| <i>Anthurium scandens</i>               | 16, 24 | 24, 48,<br>84     | Sheffer & Kamemoto, 1976<br>Sheffer & Croat, 1983               |
| <i>Anthurium scandens.<br/>scandens</i> |        | 48, 84            | Sheffer & Croat, 1983<br>Petersen, 1989                         |
| <i>Anthurium scherzerianum</i>          | 15, 16 | 14, 30,<br>32     | Subramanian & Munian, 1988<br>Sheffer & Croat, 1983             |

|                                  |    |                      |                                                        |
|----------------------------------|----|----------------------|--------------------------------------------------------|
|                                  |    |                      | Petersen, 1989                                         |
| <i>Anthurium schlechtendalii</i> | 15 | 30                   | Sheffer & Croat, 1983                                  |
| <i>Anthurium schottianum</i>     |    | 30                   | Sheffer & Croat, 1983                                  |
| <i>Anthurium scolopendrinum</i>  |    | 20, 40               | Sheffer & Kamemoto, 1976                               |
| <i>Anthurium seibertii</i>       |    | 30                   | Sheffer & Croat, 1983                                  |
| <i>Anthurium seleri</i>          |    | 30                   | Sheffer & Croat, 1983                                  |
| <i>Anthurium sellowianum</i>     | 15 |                      | Petersen, 1989                                         |
| <i>Anthurium signatum</i>        |    | 30 + B,<br>34        | Sheffer & Croat, 1983<br>Petersen, 1989                |
| <i>Anthurium solitarum</i>       |    | 30 + B,<br>34        | Sheffer & Croat, 1983<br>Petersen, 1989                |
| <i>Anthurium splendidum</i>      | 15 | 30 + Bs              | Bhattacharya, 1976<br>Vij et al., 1982<br>Sharma, 1970 |
| <i>Anthurium standleyi</i>       |    | 60                   | Sheffer & Croat, 1983                                  |
| <i>Anthurium subhastatum</i>     |    | 30                   | Sheffer & Kamemoto, 1976                               |
| <i>Anthurium subovatum</i>       |    | 30                   | Sheffer & Croat, 1983                                  |
| <i>Anthurium subsignatum</i>     |    | 30                   | Marutani et al., 1993                                  |
| <i>Anthurium supianum</i>        |    | c. 90                | Sheffer & Kamemoto, 1976                               |
| <i>Anthurium tenerum</i>         |    | 30                   | Sheffer & Croat, 1983                                  |
| <i>Anthurium testaceum</i>       |    | 30                   | Sheffer & Croat, 1983                                  |
| <i>Anthurium tonduzii</i>        |    | 30                   | Sheffer & Croat, 1983                                  |
| <i>Anthurium trianae</i>         |    | 28, 29<br>+ 1B       | Sheffer & Kamemoto, 1976                               |
| <i>Anthurium triangulum</i>      |    | 30                   | Sheffer & Kamemoto, 1976                               |
| <i>Anthurium trinerve</i>        |    | 24, 30               | Petersen, 1989                                         |
| <i>Anthurium trinerve</i>        |    | 24, 30               | Sheffer & Croat, 1983                                  |
| <i>Anthurium triphyllum</i>      | 30 | 60                   | Bhattacharya, 1976<br>Vij et al., 1982                 |
| <i>Anthurium turrialbense</i>    |    | 30                   | Sheffer & Kamemoto, 1976                               |
| <i>Anthurium umbrosum</i>        |    | 30                   | Sheffer & Croat, 1983                                  |
| <i>Anthurium undatum</i>         |    | c. 60 +<br>B         | Marchant, 1973                                         |
| <i>Anthurium upalaense</i>       |    | 30                   | Sheffer & Croat, 1983                                  |
| <i>Anthurium vallense</i>        |    | 30                   | Sheffer & Croat, 1983                                  |
| <i>Anthurium veitchii</i>        | 15 | 30                   | Sheffer & Kamemoto, 1976                               |
| <i>Anthurium velutium</i>        |    | 30                   | Sheffer & Kamemoto, 1976                               |
| <i>Anthurium venosum</i>         |    | 30                   | Sheffer & Kamemoto, 1976                               |
| <i>Anthurium wallisii</i>        |    | 30 +<br>2B, c.<br>60 | Sheffer & Kamemoto, 1976                               |
| <i>Anthurium warocqueanum</i>    | 15 | 30 + Bs              | Marutani & Kamemoto, 1983<br>Petersen, 1989            |
| <i>Anthurium watermaliense</i>   |    | 30                   | Sheffer & Croat, 1983                                  |
| <i>Anthurium wendlingeri</i>     |    | 30                   | Sheffer & Croat, 1983                                  |
| <i>Anthurium wullschlaegelii</i> |    | 30                   | Sheffer & Kamemoto, 1976                               |
| <i>Anubias afzelii</i>           |    | 48                   | Arends & van der Laan, 1982                            |
| <i>Anubias gigantea</i>          |    | 48                   | Arends & van der Laan, 1982                            |
| <i>Anubias gillettii</i>         |    | 48                   | Arends & van der Laan, 1982                            |



|                                                                                   |                                    |                                                                                                |
|-----------------------------------------------------------------------------------|------------------------------------|------------------------------------------------------------------------------------------------|
| <i>Anubias gracilis</i>                                                           | 48                                 | Arends & van der Laan, 1982                                                                    |
| <i>Anubias hastifolia</i>                                                         | 48                                 | Arends & van der Laan, 1982                                                                    |
| <i>Anubias heterophylla</i>                                                       | 48                                 | Arends & van der Laan, 1982                                                                    |
| <i>Anubias lanceolata</i>                                                         | 48                                 | Marchant, 1971a                                                                                |
| <i>Anubias pynaertii</i>                                                          | 48                                 | Arends & van der Laan, 1982                                                                    |
| <i>Apoballis</i><br>( <i>Schismatoglottis</i> )<br><i>belophylla</i>              | 26                                 | Petersen, 1989                                                                                 |
| <i>Apoballis</i><br>( <i>Schismatoglottis</i> )<br><i>brevipes</i>                | 26 + Bs                            | Okada, 2000<br>Petersen, 1989                                                                  |
| <i>Apoballis</i><br>( <i>Schismatoglottis</i> )<br><i>okadae</i>                  | 26 + B                             | Okada, 1982                                                                                    |
| <i>Apoballis</i><br>( <i>Schismatoglottis</i> )<br><i>rupestris</i>               | 26 + B                             | Marchant, 1971a                                                                                |
| <i>Apoballis acuminatissima</i><br>( <i>Schismatoglottis</i><br><i>concinna</i> ) | 26, 39                             | Petersen, 1989                                                                                 |
| <i>Apoballis acuminatissima</i><br>( <i>Schismatoglottis</i><br><i>kurimana</i> ) | 26                                 | Okada, 1982                                                                                    |
| <i>Apoballis mutata</i><br>( <i>Schismatoglottis</i><br><i>batoeensis</i> )       | 26                                 | Petersen, 1989                                                                                 |
| <i>Apoballis rupestris</i><br>( <i>Schismatoglottis</i><br><i>treubii</i> )       | 56                                 | Petersen, 1989                                                                                 |
| <i>Apoballis rupestris</i><br>( <i>Schismatoglottis</i><br><i>wigmannii</i> )     | 24                                 | Petersen, 1989                                                                                 |
| <i>Aridarum annae</i>                                                             | 26                                 | Okada, 2000                                                                                    |
| <i>Aridarum burttii</i>                                                           | 26                                 | Okada, 2000                                                                                    |
| <i>Aridarum incavum</i>                                                           | 24, 26                             | Okada, 2000                                                                                    |
| <i>Aridarum nicolsonii</i>                                                        |                                    | Petersen, 1989                                                                                 |
| <i>Ariopsis peltata</i>                                                           | 28, 84,<br>86                      | Petersen, 1989<br>Marchant, 1971a                                                              |
| <i>Arisaema aequinoctiale</i>                                                     | 26                                 | Watanabe et al., 1998                                                                          |
| <i>Arisaema album</i>                                                             | 28                                 | Petersen, 1989                                                                                 |
| <i>Arisaema amurense</i>                                                          | 26,28,<br>39, 48,<br>52, 56,<br>70 | Ae, 1975<br>Serizawa, 1981<br>Murata, 1990<br>Sokolovskaya & Probatova, 1985<br>Petersen, 1989 |
| <i>Arisaema angustatum</i>                                                        | 28                                 | Watanabe et al., 1998                                                                          |
| <i>Arisaema aprile</i>                                                            | 28                                 | Murata, J. 1983                                                                                |
| <i>Arisaema atrorubens</i>                                                        | 56                                 | Kapoor, B. M. 1982                                                                             |
| <i>Arisaema bauriculatum</i>                                                      | 28                                 | Gu, Z.-j. & H. Sun 1998                                                                        |
| <i>Arisaema candidissimum</i>                                                     | 56                                 | Petersen, 1989                                                                                 |
| <i>Arisaema caudatum</i>                                                          | 28                                 | Patil, K. S. & G. B. Dixit 1995                                                                |

|                                   |                                   |                                                                       |
|-----------------------------------|-----------------------------------|-----------------------------------------------------------------------|
| <i>Arisaema concinum</i>          | 28, 56                            | Mehra, P. N. & S. K. Sachdeva 1976<br>Petersen, 1989                  |
| <i>Arisaema consanguineum</i>     | 28, 48,<br>56                     | Wang, Jenn-che 1996<br>Sarkar, A. K. & N. Datta 1978                  |
| <i>Arisaema consenouinum</i>      | 28                                | Sarkar, A. K. 1991                                                    |
| <i>Arisaema costatum</i>          | 20                                | Murata, J. 1990                                                       |
| <i>Arisaema cucullatum</i>        | 28                                | Petersen, 1989                                                        |
| <i>Arisaema curvatum</i>          | 28                                | Mehra, P. N. & S. K. Sachdeva 1976                                    |
| <i>Arisaema decipiens</i>         | 28                                | Sharma, 1970                                                          |
| <i>Arisaema draconitium</i>       | 56                                | Murata, J. & M. Iijima 1983                                           |
| <i>Arisaema dulongense</i>        | 26                                | Gu, Z.-j., L. Wang & H. Li 1992                                       |
| <i>Arisaema echinatum</i>         | 28                                | Petersen, 1989                                                        |
| <i>Arisaema ehimense</i>          | 28                                | Murata, J. & J. Ohno 1989                                             |
| <i>Arisaema erubescens</i>        | 28, 56                            | Gu, Z.-j., L. Wang & H. Li 1992<br>Mehra, P. N. & S. K. Sachdeva 1976 |
| <i>Arisaema filiforme</i>         | 28                                | Murata, J. 1990                                                       |
| <i>Arisaema flavum</i>            | 56                                | Murata, J. & M. Iijima 1983                                           |
| <i>Arisaema formosanum</i>        | 28, 56                            | Wang, Jenn-che 1996                                                   |
| <i>Arisaema franchetianum</i>     | 56                                | Murata, J. & M. Iijima 1983                                           |
| <i>Arisaema galeatum</i>          | 26                                | Murata, J. 1990                                                       |
| <i>Arisaema grapsospadix</i>      | 28                                | Wang, Jenn-che 1996                                                   |
| <i>Arisaema griffithii</i>        | 28, 32<br>+ 1B                    | Sharma, 1970<br>Bhattacharya, 1978                                    |
| <i>Arisaema hatizyoense</i>       | 26                                | Watanabe et al., 1998                                                 |
| <i>Arisaema heterocephalum</i>    | 28                                | Petersen, 1989                                                        |
| <i>Arisaema heterophyllum</i>     | 28, 56,<br>64, 84,<br>140,<br>168 | Murata, 1990<br>Wang, 1996<br>Ko & Kim, 1985                          |
| <i>Arisaema ilanense</i>          | 28                                | Wang, 1996                                                            |
| <i>Arisaema inclusum</i>          | 24                                | Murata & Iijima, 1983                                                 |
| <i>Arisaema intermedium</i>       | 14<br>28                          | Mehra & Sachdeva, 1976<br>Sachdeva, 1977                              |
| <i>Arisaema iyonum</i>            | 28                                | Petersen, 1989                                                        |
| <i>Arisaema Jacquemontii</i>      | 28, 52                            | Mehra & Sachdeva, 1976<br>Petersen, 1989                              |
| <i>Arisaema japonicum</i>         | 26, 28,<br>42                     | Watanabe et al., 1998<br>Petersen, 1989                               |
| <i>Arisaema kawashimae</i>        | 28                                | Serizawa, 1980                                                        |
| <i>Arisaema kelung-insulares</i>  | 28                                | Petersen, 1989                                                        |
| <i>Arisaema kishidae</i>          | 28                                | Watanabe et al., 1998                                                 |
| <i>Arisaema kiushianum</i>        | 56                                | Petersen, 1989                                                        |
| <i>Arisaema komarovii</i>         | 56                                | Sokolovskaya & Probatova, 1985                                        |
| <i>Arisaema leschenaultii</i>     | 28                                | Petersen, 1989                                                        |
| <i>Arisaema limbatum</i>          | 26                                | Watanabe et al., 1998                                                 |
| <i>Arisaema lobatum</i>           | 28, 56,<br>Ca. 84                 | Murata, 1990<br>Hong & Zhang, 1990                                    |
| <i>Arisaema longilaminum</i>      | 28                                | Petersen, 1989                                                        |
| <i>Arisaema longipedunculatum</i> | 28, 56                            | Serizawa, 1981                                                        |

|                                 |        |                    |                                                                                               |
|---------------------------------|--------|--------------------|-----------------------------------------------------------------------------------------------|
| <i>Arisaema macrospathum</i>    |        | 28                 | Pringle, 1979                                                                                 |
| <i>Arisaema maximowiczii</i>    |        | 28                 | Petersen, 1989                                                                                |
| <i>Arisaema minamitanii</i>     |        | 28                 | Murata, 1990                                                                                  |
| <i>Arisaema minus</i>           |        | 26                 | Watanabe et al., 1998                                                                         |
| <i>Arisaema monophyllum</i>     |        | 28                 | Murata & Iijima, 1983                                                                         |
| <i>Arisaema murrayi</i>         | 14     | 28, 56             | Patil & Dixit, 1995                                                                           |
| <i>Arisaema nambae</i>          |        | 28                 | Watanabe et al., 1998                                                                         |
| <i>Arisaema nanjenense</i>      |        | 28                 | Huang & Wu, 1997                                                                              |
| <i>Arisaema negishii</i>        |        | 28                 | Ko et al., 1987                                                                               |
| <i>Arisaema neglectum</i>       |        | 28, 56             | Ramachandran, 1978<br>Subramanian & Munian, 1988                                              |
| <i>Arisaema nepenthoides</i>    |        | 26 + 1B            | Bhattacharya, 1978                                                                            |
| <i>Arisaema nikoense</i>        |        | 28                 | Watanabe et al., 1998                                                                         |
| <i>Arisaema ogatae</i>          |        | 28                 | Petersen, 1989                                                                                |
| <i>Arisaema ostiolatum</i>      |        | 28                 | Petersen, 1989                                                                                |
| <i>Arisaema ovale</i>           |        | 26, 52,<br>56, 112 | Ko et al., 1987<br>Petersen, 1989                                                             |
| <i>Arisaema peninsulae</i>      |        | 26, 28             | Lee, 1967                                                                                     |
| <i>Arisaema pingbianense</i>    |        | 28                 | Murata, 1990                                                                                  |
| <i>Arisaema polyphyllum</i>     |        | 28                 | Petersen, 1989                                                                                |
| <i>Arisaema propinquum</i>      |        | 28                 | Petersen, 1989                                                                                |
| <i>Arisaema rhizomatum</i>      |        | 28                 | Murata & Iijima 1983                                                                          |
| <i>Arisaema ringens</i>         |        | 28, 56             | Watanabe et al., 1998<br>Petersen, 1989                                                       |
| <i>Arisaema robustum</i>        |        | 56                 | Ko & Kim 1985                                                                                 |
| <i>Arisaema roxburghii</i>      |        | 24                 | Petersen, 1989                                                                                |
| <i>Arisaema sachalinense</i>    |        | 56                 | Murata, J. 1990                                                                               |
| <i>Arisaema sahyadricum</i>     |        | 28                 | Patil & Dixit 1995                                                                            |
| <i>Arisaema sanguineum</i>      |        | 28                 | Sharma & Mukhopadhyay, 1963                                                                   |
| <i>Arisaema sazeno</i>          |        | 28                 | Murata & Iijima, 1983                                                                         |
| <i>Arisaema schimperianum</i>   |        | 28                 | Petersen, 1989                                                                                |
| <i>Arisaema seppikoense</i>     |        | 26                 | Watanabe et al., 1998                                                                         |
| <i>Arisaema serratum</i>        |        | 26, 28             | Iijima, 1982                                                                                  |
| <i>Arisaema sikkimense</i>      |        | 26 + 1B            | Bhattacharya, 1978                                                                            |
| <i>Arisaema sikokianum</i>      |        | 28                 | Watanabe et al., 1998                                                                         |
| <i>Arisaema speciosum</i>       |        | 28                 | Sharma, 1970                                                                                  |
| <i>Arisaema stenophyllum</i>    |        | 26                 | Watanabe et al., 1998                                                                         |
| <i>Arisaema taiwanense</i>      |        | 28                 | Wang, Jenn-che 1996                                                                           |
| <i>Arisaema takedae</i>         |        | 28                 | Petersen, 1989                                                                                |
| <i>Arisaema takesimense</i>     |        | 28                 | Ko et al., 1987                                                                               |
| <i>Arisaema tashiroi</i>        |        | 28                 | Petersen, 1989                                                                                |
| <i>Arisaema ternatipartitum</i> |        | 72                 | Watanabe et al., 1998                                                                         |
| <i>Arisaema thunbergii</i>      |        | 28                 | Ko & Kim, 1985                                                                                |
| <i>Arisaema tortuosum</i>       | 14, 26 | 24, 26,<br>28, 56  | Mehra & Sachdeva, 1976<br>Ramachandran, 1978<br>Sachdeva, 1977<br>Sharma & Mukhopadhyay, 1963 |
| <i>Arisaema tosaense</i>        |        | 28                 | Watanabe et al., 1998                                                                         |
| <i>Arisaema triphyllum</i>      |        | 28, 56             | Hill, 1995<br>Sachdeva, 1977                                                                  |

|                                                    |    |                   |                                                                                      |
|----------------------------------------------------|----|-------------------|--------------------------------------------------------------------------------------|
| <i>Arisaema undulatifolium</i>                     |    | 26                | Watanabe et al., 1998                                                                |
| <i>Arisaema urashima</i>                           |    | 28                | Watanabe et al., 1998                                                                |
| <i>Arisaema wallichianum</i>                       | 14 | 26 + 4B           | Mehra & Sachdeva, 1976<br>Sharma, 1970                                               |
| <i>Arisaema wightianum</i>                         |    | 28                | Subramanian & Munian, 1988                                                           |
| <i>Arisaema wightii</i>                            |    | 28                | Ramachandran, 1978                                                                   |
| <i>Arisaema yamatense</i>                          |    | 28                | Watanabe et al., 1998                                                                |
| <i>Arisaema yunnanense</i>                         |    | 48                | Murata & Iijima, 1983                                                                |
| <i>Arisarum proboscideum</i>                       |    | 14, 28,<br>42, 56 | Diosdado et al., 1993<br>Petersen, 1989                                              |
| <i>Arisarum vulgare</i>                            | 28 | 56                | Aboucaya & Verlaque, 1990<br>Petersen, 1989                                          |
| <i>Arophyton buchettii</i>                         |    | 40                | Petersen, 1989                                                                       |
| <i>Arophyton crassifolium</i>                      |    | 54                | Petersen, 1989                                                                       |
| <i>Arophyton humbertii</i>                         |    | 38                | Petersen, 1989                                                                       |
| <i>Arophyton rhizomatosum</i>                      |    | 38                | Petersen, 1989                                                                       |
| <i>Arophyton simplex</i>                           |    | 38                | Sharma, 1970                                                                         |
| <i>Arophyton tripartitum</i>                       |    | c. 76             | Marchant, 1970                                                                       |
| <i>Arum alpinum</i> = <i>Arum<br/>cylindraceum</i> |    | 28                | D'Emerico et al., 1993                                                               |
| <i>Arum apulum</i>                                 |    | 56, 63,<br>70     | Bianco et al., 1993                                                                  |
| <i>Arum arisarum</i>                               |    | 56                | Fernandez & Ruiz Rujon, 1976                                                         |
| <i>Arum byzantinum</i>                             |    | 28                | Alpinar, 1986                                                                        |
| <i>Arum concinnatum</i>                            |    | 84                | Alpinar, 1986                                                                        |
| <i>Arum creticum</i>                               |    | 28                | Alpinar, 1987                                                                        |
| <i>Arum cyrenaicum</i>                             |    | 56                | Petersen, 1989                                                                       |
| <i>Arum detruncatum</i>                            |    | 28                | Alpinar, 1986                                                                        |
| <i>Arum dioscoridis</i>                            |    | 28                | Alpinar, 1986                                                                        |
| <i>Arum elongatum</i>                              |    | 28                | Alpinar, 1986                                                                        |
| <i>Arum euxinum</i>                                |    | 28                | Alpinar, 1986                                                                        |
| <i>Arum hygrophilum</i>                            |    | 28, 29            | Bedalov, 1978<br>Petersen, 1989                                                      |
| <i>Arum idaeum</i>                                 |    | 28                | Bedalov & Küpfer, 2006                                                               |
| <i>Arum italicum</i>                               |    | 28, 70,<br>84     | Alpinar, 1986<br>Petersen, 1989                                                      |
| <i>Arum korolkowii</i>                             |    | 28                | Petersen, 1989                                                                       |
| <i>Arum maculatum</i>                              |    | 28, 30,<br>42, 56 | Šopova & Sekovski, 1989<br>Mesíček, 1992<br>D'Emerico et al., 1993<br>Petersen, 1989 |
| <i>Arum nickelii</i>                               |    | 84                | Alpinar, 1986                                                                        |
| <i>Arum nigrum</i>                                 |    | 28                | D'Emerico et al., 1993                                                               |
| <i>Arum orientale</i>                              |    | 28                | Bedalov et al., 1998                                                                 |
| <i>Arum palaestinum</i>                            |    | 28                | Bedalov, 1978                                                                        |
| <i>Arum petteri</i>                                |    | 28                | Petersen, 1989                                                                       |
| <i>Arum pictum</i>                                 |    | 28                | D'Emerico et al., 1993                                                               |
| <i>Arum purpureospathum</i>                        |    | 56                | Bedalov & Küpfer, 2006                                                               |
| <i>Arum rupicola</i>                               |    | 28                | Bedalov & Küpfer, 2006                                                               |
| <i>Arum sintenisii</i>                             |    | 28                | Bedalov & Küpfer, 2006                                                               |

|                                                             |                   |                                                                                                 |
|-------------------------------------------------------------|-------------------|-------------------------------------------------------------------------------------------------|
| <i>Arum sooi</i>                                            | 42                | Bedalov & Terpo, 1998                                                                           |
| <i>Asterostigma cryptostylum</i>                            | 34                | Bogner, 1997                                                                                    |
| <i>Asterostigma lividum</i>                                 | 34 + Bs           | Petersen, 1989                                                                                  |
| <i>Bakoa (Piptospatha) brevipedunculata</i>                 | 26                | Okada, 2000                                                                                     |
| <i>Bakoa (Piptospatha) lucens</i>                           | 26                | Okada, 2000                                                                                     |
| <i>Biarum bovei</i>                                         | 74                | Petersen, 1989                                                                                  |
| <i>Biarum carduchorum</i>                                   | 24                | Petersen, 1989                                                                                  |
| <i>Biarum carratracense</i>                                 | 22, 36, c. 96, 98 | Fernandez Piqueras & Ruiz Rujon, 1976<br>Fernandez et al., 1978<br>Marchant, 1971b              |
| <i>Biarum davisii</i>                                       | 26                | Petersen, 1989                                                                                  |
| <i>Biarum dispar</i>                                        | 74                | Talavera, 1976                                                                                  |
| <i>Biarum ditschianum</i>                                   | 26                | Petersen, 1989                                                                                  |
| <i>Biarum eximium</i>                                       | 16                | Petersen, 1989                                                                                  |
| <i>Biarum fraasianum</i>                                    | 32                | Popova & Ceschmedjiev, 1978                                                                     |
| <i>Biarum kotschyi</i>                                      | c. 96             | Petersen, 1989                                                                                  |
| <i>Biarum marmarisense</i>                                  | 22, 24, 26        | Athanasidou & Kamari, 1992<br>Gill, 1988                                                        |
| <i>Biarum pyrami</i>                                        | 108               | Borzatti von Löwenstern & Garbari, 1999                                                         |
| <i>Biarum tenuifolium</i>                                   | 16, 18, 26        | Athanasidou & Kamari, 1992<br>Petersen, 1989                                                    |
| <i>Biarum tenuifolium (B. spruneri)</i>                     | 26, 40            | Athanasidou & Kamari, 1992                                                                      |
| <i>Biarum tenuifolium ssp. arundanum (Biarum arundanum)</i> | 22                | Elena Rossello & Gallego, 1984                                                                  |
| <i>Biarum tenuifolium ssp. galiani (Biarum galiani)</i>     | 26                | Elena Rossello & Gallego, 1984                                                                  |
| <i>Bognera recondita</i>                                    | 34                | Bogner, 2008                                                                                    |
| <i>Bucephalandra catherineae</i>                            | 26                | Okada, 2000                                                                                     |
| <i>Bucephalandra magnifolia</i>                             | 26                | Okada, 2000                                                                                     |
| <i>Bucephalandra motleyana</i>                              | 26                | Okada, 2000                                                                                     |
| <i>Caladium bicolor</i>                                     | 15 22, 26, 28, 30 | Ramachandran, 1978<br>Sarkar, 1975<br>Sarkar, 1976                                              |
| <i>Caladium chanjur</i>                                     | 28                | Petersen, 1989                                                                                  |
| <i>Caladium humboldtii</i>                                  | 19                | Petersen, 1989                                                                                  |
| <i>Caladium lindenii</i>                                    | 13                | Petersen, 1989                                                                                  |
| <i>Caladium macrotites</i>                                  | 30                | Petersen, 1989                                                                                  |
| <i>Caladium striatipes</i>                                  | 22                | Petersen, 1989                                                                                  |
| <i>Calla palustris</i>                                      | 18, 36 36, 60, 72 | Uotila & Pellinen, 1985<br>Kartashova et al., 1974<br>Geber & Schweizer, 1988<br>Petersen, 1989 |
| <i>Calloopsis volkensis</i>                                 | 36                | Marchant, 1971a                                                                                 |
| <i>Carlephyton diegoense</i>                                | c. 108            | Petersen, 1989                                                                                  |
| <i>Carlephyton</i>                                          | 54                | Marchant, 1973                                                                                  |

|                                              |                           |                                                                |                                                                                                                                   |
|----------------------------------------------|---------------------------|----------------------------------------------------------------|-----------------------------------------------------------------------------------------------------------------------------------|
| <i>glaucophyllum</i>                         |                           |                                                                | Petersen, 1989                                                                                                                    |
| <i>Carlephyton</i>                           | 108                       |                                                                | Marchant, 1970                                                                                                                    |
| <i>madagascariense</i>                       |                           |                                                                |                                                                                                                                   |
| <i>Cercestis afzelii</i>                     | 42                        |                                                                | Petersen, 1989                                                                                                                    |
| <i>Cercestis camerunensis</i>                | c. 42                     |                                                                | Petersen, 1989                                                                                                                    |
| <i>Cercestis mirabilis</i>                   | 42                        |                                                                | Petersen, 1989                                                                                                                    |
| <i>Cercestis sagittatus</i>                  | 42                        |                                                                | Petersen, 1989                                                                                                                    |
| <i>Cercestis stigmatiscus</i>                | c. 36                     |                                                                | Petersen, 1989                                                                                                                    |
| <i>Cercestis talensis</i>                    | 42                        |                                                                | Petersen, 1989                                                                                                                    |
| <i>Chlorospatha corrugata</i>                | 26                        |                                                                | Bogner, 1985                                                                                                                      |
| <i>Chlorospatha longipoda</i>                | 26                        |                                                                | Petersen, 1989                                                                                                                    |
| <i>Colletogyne perrieri</i>                  | 44, 46,<br>54             |                                                                | Sharma, 1970<br>Marchant, 1973<br>Petersen, 1989                                                                                  |
| <i>Colocasia affins</i>                      | 28                        |                                                                | Petersen, 1989                                                                                                                    |
| <i>Colocasia antiquorum</i>                  | 14                        | 26, 28,<br>30, 36,<br>38, 42,<br>44, 46,<br>48, 52,<br>58, 116 | Subramanian, 1979<br>Sarkar, 1991<br>Subramanian & Munian, 1988<br>Chaudhuri & Sharma, 1979                                       |
| <i>Colocasia esculenta</i>                   | 14                        | 28, 36,<br>38, 42,<br>48, 84                                   | Ramachandran, 1978<br>Tanimoto & Matsumoto, 1986<br>Huang et al., 1989<br>Sreekumari & Mathew, 1991<br>Subramanian & Munian, 1988 |
| <i>Colocasia gigantea</i>                    | 14                        | 28, 42                                                         | Tanimoto & Matsumoto, 1986<br>Petersen, 1989                                                                                      |
| <i>Colocasia indica</i>                      | 28                        |                                                                | Ankei, 1987                                                                                                                       |
| <i>Croatiella integrifolia</i>               | 34                        |                                                                | Bogner, 2008                                                                                                                      |
| <i>Cryptocoryne affinis</i>                  | 34                        |                                                                | Arends et al., 1982                                                                                                               |
| <i>Cryptocoryne albida</i>                   | 36                        |                                                                | Arends et al., 1982                                                                                                               |
| <i>Cryptocoryne amicum</i>                   | 34                        |                                                                | Arends et al., 1982                                                                                                               |
| <i>Cryptocoryne annamica</i>                 | 34                        |                                                                | Petersen, 1993                                                                                                                    |
| <i>Cryptocoryne</i><br><i>aponogetifolia</i> | 34                        |                                                                | Petersen, 1989                                                                                                                    |
| <i>Cryptocoryne auriculata</i>               | 34                        |                                                                | Petersen, 1993                                                                                                                    |
| <i>Cryptocoryne balansae</i>                 | 36                        |                                                                | Jacobson, 1977                                                                                                                    |
| <i>Cryptocoryne beckettii</i>                | 28, 42                    |                                                                | Arends et al., 1982; Petersen, 1989                                                                                               |
| <i>Cryptocoryne</i><br><i>bertelibanseni</i> | 36                        |                                                                | Jacobson, 1977                                                                                                                    |
| <i>Cryptocoryne blassii</i>                  | 102                       |                                                                | Jacobson, 1977                                                                                                                    |
| <i>Cryptocoryne bogneri</i>                  | 36                        |                                                                | Jacobson, 1977                                                                                                                    |
| <i>Cryptocoryne bullosa</i>                  | 34                        |                                                                | Jacobson, 1977                                                                                                                    |
| <i>Cryptocoryne ciliata</i>                  | 22, 33                    |                                                                | Jacobson, 1977                                                                                                                    |
| <i>Cryptocoryne cognata</i>                  | 28                        |                                                                | Petersen, 1993a                                                                                                                   |
| <i>Cryptocoryne consobrina</i>               | 36                        |                                                                | Petersen, 1989                                                                                                                    |
| <i>Cryptocoryne cordata</i>                  | 28, 34,<br>68, 85,<br>102 |                                                                | Jacobson, 1977<br>Patil & Dixit, 1995                                                                                             |

|                                     |                          |                                                                                                                             |
|-------------------------------------|--------------------------|-----------------------------------------------------------------------------------------------------------------------------|
| <i>Cryptocoryne costata</i>         | 34                       | Jacobson, 1977                                                                                                              |
| <i>Cryptocoryne crispatula</i>      | 36, 54                   | Jacobson, 1977<br>Arends et al., 1982                                                                                       |
| <i>Cryptocoryne cruddasiana</i>     | <b>36</b>                | Bogner & Petersen, 2007                                                                                                     |
| <i>Cryptocoryne didericii</i>       | 34                       | Arends et al., 1982                                                                                                         |
| <i>Cryptocoryne edithiae</i>        | 34, 68                   | Arends et al., 1982<br>Petersen, 1989                                                                                       |
| <i>Cryptocoryne elliptica</i>       | 34                       | Petersen, 1989                                                                                                              |
| <i>Cryptocoryne ferruginea</i>      | 34, 68                   | Arends et al., 1982<br>Petersen, 1989                                                                                       |
| <i>Cryptocoryne fusca</i>           | 34                       | Arends et al., 1982                                                                                                         |
| <i>Cryptocoryne gasseri</i>         | 30, 34                   | Jacobson, 1977<br>Arends et al., 1982                                                                                       |
| <i>Cryptocoryne grabowskii</i>      | 68                       | Arends et al., 1982                                                                                                         |
| <i>Cryptocoryne gracilis</i>        | 20                       | Arends et al., 1982                                                                                                         |
| <i>Cryptocoryne griffithii</i>      | 34                       | Arends et al., 1982                                                                                                         |
| <i>Cryptocoryne hudoroi</i>         | 20                       | Petersen, 1989                                                                                                              |
| <i>Cryptocoryne jacobsenii</i>      | 34                       | Arends et al., 1982                                                                                                         |
| <i>Cryptocoryne keei</i>            | 20, 34                   | Arends et al., 1982<br>Petersen, 1989                                                                                       |
| <i>Cryptocoryne lingua</i>          | 36                       | Arends et al., 1982                                                                                                         |
| <i>Cryptocoryne longicauda</i>      | 30                       | Arends et al., 1982                                                                                                         |
| <i>Cryptocoryne longispatha</i>     | 36                       | Marchant, 1971b                                                                                                             |
| <i>Cryptocoryne lutea</i>           | 28                       | Jacobson, 1977                                                                                                              |
| <i>Cryptocoryne minima</i>          | 34                       | Jacobson, 1977                                                                                                              |
| <i>Cryptocoryne moehlmannii</i>     | 30                       | Arends et al., 1982                                                                                                         |
| <i>Cryptocoryne nevillii</i>        | 28, 30                   | Arends et al., 1982<br>Petersen, 1989                                                                                       |
| <i>Cryptocoryne nurii</i>           | 34                       | Arends et al., 1982                                                                                                         |
| <i>Cryptocoryne pallidinervia</i>   | 34                       | Petersen, 1989                                                                                                              |
| <i>Cryptocoryne parva</i>           | 28                       | Jacobson, 1977                                                                                                              |
| <i>Cryptocoryne petchii</i>         | 42                       | Jacobson, 1977                                                                                                              |
| <i>Cryptocoryne pontederiifolia</i> | 30                       | Jacobson, 1977                                                                                                              |
| <i>Cryptocoryne purpurea</i>        | 34                       | Jacobson, 1977                                                                                                              |
| <i>Cryptocoryne pygmaea</i>         | 34                       | Arends et al., 1982                                                                                                         |
| <i>Cryptocoryne retrospiralis</i>   | 36, 56,<br>70, 72,<br>90 | Arends et al., 1982<br>Jacobson, 1977<br>Patil & Dixit, 1995<br>Subramanian & Munian, 1988<br>Sampathkumar & Ayyangar, 1981 |
| <i>Cryptocoryne schulzei</i>        | 34, 68                   | Arends et al., 1982<br>Petersen, 1989                                                                                       |
| <i>Cryptocoryne scurrilis</i>       | 68                       | Arends et al., 1982                                                                                                         |
| <i>Cryptocoryne siamensis</i>       | 68                       | Jacobson, 1977                                                                                                              |
| <i>Cryptocoryne sp.</i>             | 34                       | Petersen, 1993                                                                                                              |
| <i>Cryptocoryne spiralis</i>        | 45 33, 66,<br>70, 72,    | Jacobson, 1977<br>Ramachandran, 1978                                                                                        |

|                                 |            |                             |
|---------------------------------|------------|-----------------------------|
|                                 | 88, 90,    | Sarkar et al., 1976         |
|                                 | 112,       | Arends et al., 1982         |
|                                 | Ca. 132    | Patil & Dixit, 1995         |
|                                 |            | Subramanian & Munian, 1988  |
|                                 |            | Petersen, 1993              |
| <i>Cryptocoryne striolata</i>   | 20         | Arends et al., 1982         |
| <i>Cryptocoryne thwaitesii</i>  | 36, 42     | Jacobsen, 1976              |
|                                 |            | Marchant, 1971b             |
| <i>Cryptocoryne tonkinensis</i> | 36         | Jacobson, 1977              |
| <i>Cryptocoryne tortilis</i>    | 34         | Arends et al., 1982         |
| <i>Cryptocoryne undulata</i>    | 28, 42     | Jacobson, 1977              |
| <i>Cryptocoryne usteriana</i>   | 34         | Jacobson, 1977              |
| <i>Cryptocoryne venemae</i>     | 34         | Arends et al., 1982         |
| <i>Cryptocoryne versteegii</i>  | 34         | Jacobson, 1977              |
| <i>Cryptocoryne villosa</i>     | 30         | Petersen, 1989              |
| <i>Cryptocoryne walkeri</i>     | 28, 42     | Arends et al., 1982         |
|                                 |            | Jacobson, 1977              |
| <i>Cryptocoryne wendtii</i>     | 28, 42     | Jacobson, 1977              |
| <i>Cryptocoryne willisii</i>    | 28         | Marchant, 1971b             |
| <i>Cryptocoryne zonata</i>      | 68         | Arends et al., 1982         |
| <i>Cryptocoryne zukalii</i>     | 34         | Arends et al., 1982         |
| <i>Culcasia glandulosa</i>      | 42         | Petersen, 1989              |
| <i>Culcasia liberica</i>        | c. 42      | Petersen, 1989              |
| <i>Culcasia longevaginata</i>   | 42         | Petersen, 1989              |
| <i>Culcasia orientales</i>      | 42         | Petersen, 1989              |
| <i>Culcasia ponduriformes</i>   | c. 42      | Petersen, 1989              |
| <i>Culcasia rotundifolia</i>    | 42         | Petersen, 1989              |
| <i>Culcasia saxatilis</i>       | c. 42      | Petersen, 1989              |
| <i>Culcasia scandes</i>         | c. 40      | Petersen, 1989              |
| <i>Culcasia seretii</i>         | 42         | Petersen, 1989              |
| <i>Cyrtosperma chamissonis</i>  | 24         | Petersen, 1989              |
| <i>Cyrtosperma</i>              | 26         | Petersen, 1989              |
| <i>cuspidispathum</i>           |            |                             |
| <i>Cyrtosperma ferox</i>        | 26         | Petersen, 1989              |
| <i>Cyrtosperma johnstonii</i>   | 26         | Petersen, 1989              |
| <i>Dieffenbachia amoena</i>     | 34         | Gireesh & Bhavanandan, 1994 |
| <i>Dieffenbachia</i>            | 34         | Gireesh & Bhavanandan, 1994 |
| <i>barraquiniana</i>            |            |                             |
| <i>Dieffenbachia baumanii</i>   | 54         | Petersen, 1989              |
| <i>Dieffenbachia bausei</i>     | c. 17 34   | Petersen, 1989              |
| <i>Dieffenbachia eburnea</i>    | 34         | Damerval, 1980              |
| <i>Dieffenbachia exotica</i>    | 34         | Gireesh & Bhavanandan, 1994 |
| <i>Dieffenbachia hoffmannii</i> | 34         | Petersen, 1989              |
| <i>Dieffenbachia</i>            | 17 34      | Petersen, 1989              |
| <i>macrophylla</i>              |            |                             |
| <i>Dieffenbachia maculata</i>   | 34, 40     | Gireesh & Bhavanandan, 1994 |
| <i>Dieffenbachia</i>            | 34         | Petersen, 1989              |
| <i>memoriacorsii</i>            |            |                             |
| <i>Dieffenbachia oerstedii</i>  | 34         | Petersen, 1989              |
| <i>Dieffenbachia picta</i>      | 17 34, 36, | Ramachandran, 1978          |



|                                                                    |               |                                               |
|--------------------------------------------------------------------|---------------|-----------------------------------------------|
|                                                                    | 68            | Sharma, 1970                                  |
|                                                                    |               | Subramanian & Munian, 1988                    |
| <i>Dieffenbachia seguine</i>                                       | 34            | Petersen, 1989                                |
| <i>Dieffenbachia splendens</i>                                     | 34            | Damerval, 1980                                |
| <i>Dracontioides desciscens</i>                                    | 26            | Petersen, 1989                                |
| <i>Dracontium aricuaisanum</i>                                     | 26            | Petersen, 1989                                |
| <i>Dracontium changuango</i>                                       | 26            | Petersen, 1989                                |
| <i>Dracontium foecundum</i>                                        | 26            | Petersen, 1989                                |
| <i>Dracontium gigas</i>                                            | 26            | Petersen, 1989                                |
| <i>Dracontium prancei</i><br>( <i>polyphyllum</i> )                | 26            | Petersen, 1989                                |
| <i>Dracunculus canariensis</i>                                     | 28            | Petersen, 1989                                |
| <i>Dracunculus muscivorus</i>                                      | 56            | Scrugli, 1977                                 |
| <i>Dracunculus vulgaris</i>                                        | 28, 32        | Popova & Ceschmedjiev, 1978<br>Van Loon, 1982 |
| <i>Eminium crassipes</i>                                           | 14 28 (56)    | Petersen, 1989                                |
| <i>Eminium koenenianum</i>                                         | 28            | Johnson & Brandham, 1997                      |
| <i>Eminium lehmannii</i>                                           | 28            | Petersen, 1989                                |
| <i>Epipremnum falicifolium</i>                                     | 84            | Petersen, 1989                                |
| <i>Epipremnum mirabile</i>                                         | 70            | Sharma, 1970                                  |
| <i>Epipremnum pinnatum</i>                                         | 60            | Petersen, 1989                                |
| <i>Filarum manserichense</i>                                       | 28            | This paper                                    |
| <i>Furtadoa sumatrensis</i>                                        | 40            | Okada, 1982                                   |
| <i>Furtadoa sumatrensis</i>                                        | 40            | Petersen, 1989                                |
| <i>Furtadoa sumatrensis</i>                                        | 40            | Okada, 2000                                   |
| <i>Gearum brasiliense</i>                                          | <b>34, 68</b> | Bogner & Petersen, 2007                       |
| <i>Gonatopus</i><br>( <i>Heterolobium</i> )<br><i>petiolulatus</i> | 34            | Marchant, 1971a                               |
| <i>Gonatopus angustus</i>                                          | c. 68         | Petersen, 1989                                |
| <i>Gonatopus boivinii</i>                                          | 34            | Petersen, 1989                                |
| <i>Gonatopus marattioides</i>                                      | 34            | Petersen, 1989                                |
| <i>Gonatopus petiolulatus</i>                                      | 34            | Petersen, 1989                                |
| <i>Gorgonidium mirabile</i>                                        | 34            | Petersen, 1989                                |
| <i>Gorgonidium vargasii</i>                                        | 34            | Petersen, 1989                                |
| <i>Gorgonidium vermicidum</i>                                      | 34            | Petersen, 1989                                |
| <i>Gymnostachys anceps</i>                                         | 48            | Petersen, 1989                                |
| <i>Hapaline benthamiana</i>                                        | 26            | Petersen, 1989                                |
| <i>Hapaline brownii</i>                                            | 28            | Petersen, 1989                                |
| <i>Helicodiceros muscivorus</i>                                    | 56            | Petersen, 1989                                |
| <i>Hestia longifolia</i>                                           | 26            | This paper                                    |
| <i>Heteropsis oblongifolia</i>                                     | 26, 28        | Petersen, 1989                                |
| <i>Holochlamys beccarii</i>                                        | 30, 60        | Petersen, 1989<br>Oginuma et al., 1998        |
| <i>Homalomena caeruleascens</i>                                    | 40            | Marchant, 1971a                               |
| <i>Homalomena consobrina</i>                                       | 40            | Okada, 2000                                   |
| <i>Homalomena cordata</i>                                          | 40            | Petersen, 1989                                |
| <i>Homalomena cristata</i>                                         | 40            | Petersen, 1989                                |
| <i>Homalomena elliptica</i>                                        | 42            | Petersen, 1989                                |
| <i>Homalomena gadutensis</i>                                       | 38            | Okada, 1985                                   |

|                                                            |                                |                                       |
|------------------------------------------------------------|--------------------------------|---------------------------------------|
| <i>Homalomena griffithii</i>                               | 40                             | Okada, 2000                           |
| <i>Homalomena hastata</i>                                  | 40                             | Okada, 1985                           |
| <i>Homalomena humilis</i>                                  | 40, 42                         | Petersen, 1989                        |
| <i>Homalomena lancifolia</i>                               | 40                             | Okada, 2000                           |
| <i>Homalomena lindenii</i>                                 | 40, 56                         | Petersen, 1989                        |
| <i>Homalomena lindenii</i><br>( <i>Alocasia lindenii</i> ) | 40, 56                         | Sharma, 1970                          |
| <i>Homalomena megalophylla</i>                             | 40                             | Okada, 1985                           |
| <i>Homalomena monandra</i>                                 | 40                             | Petersen, 1989                        |
| <i>Homalomena occulta</i>                                  | 42                             | Petersen, 1989                        |
| <i>Homalomena padandensis</i>                              | 40                             | Petersen, 1989                        |
| <i>Homalomena pendula</i>                                  | 40                             | Petersen, 1989                        |
| <i>Homalomena pygmaea</i>                                  | 40                             | Okada, 1982                           |
| <i>Homalomena rubescens</i>                                | 40                             | Petersen, 1989                        |
| <i>Homalomena rusdii</i>                                   | 40                             | Okada, 2000                           |
| <i>Homalomena sagitifolia</i>                              | 40                             | Okada, 1982                           |
| <i>Homalomena singaporense</i>                             | 40                             | Petersen, 1989                        |
| <i>Homalomena speariae</i>                                 | 42                             | Petersen, 1989                        |
| <i>Homalomena sulcata</i>                                  | 40                             | Okada, 2000                           |
| <i>Homalomena wallisii</i>                                 | 42                             | Petersen, 1989                        |
| <i>Incarum pavonii</i>                                     | <b>34</b>                      | Bogner & Petersen, 2007               |
| <i>Jasarum steyermarkii</i>                                | 22                             | Petersen, 1989                        |
| <i>Lagenandra bogneri</i>                                  | 36                             | Petersen, 1989                        |
| <i>Lagenandra dewitii</i>                                  | 36                             | Petersen, 1989                        |
| <i>Lagenandra erosa</i>                                    | 36                             | Petersen, 1989                        |
| <i>Lagenandra jacobsenii</i>                               | 36                             | Petersen, 1989                        |
| <i>Lagenandra koenigii</i>                                 | 36                             | Petersen, 1989                        |
| <i>Lagenandra lancifolia</i>                               | 36                             | Marchant, 1971b                       |
| <i>Lagenandra meeboldii</i>                                | 36                             | Petersen, 1989                        |
| <i>Lagenandra nairii</i>                                   | c. 72                          | Petersen, 1989                        |
| <i>Lagenandra ovata</i>                                    | 18 32, 36                      | Ramachandran, 1978; Battacharya, 1975 |
| <i>Lagenandra praetermissa</i>                             | 36                             | Petersen, 1989                        |
| <i>Lagenandra schulzei</i>                                 | 36                             | Petersen, 1989                        |
| <i>Lagenandra thwaitesii</i>                               | 36                             | Arends & van der Laan, 1978           |
| <i>Lagenandra toxicaria</i>                                | 36                             | Petersen, 1989                        |
| <i>Lagenandra toxicaria</i>                                | 36                             | Marchant, 1971b                       |
| <i>Landotia punctata</i>                                   | 40                             | Landolt, 1986                         |
| <i>Lasia heterophylla</i>                                  | 26                             | Sharma, 1970                          |
| <i>Lasia heterophylla</i><br>( <i>spinosa</i> )            | 13 26                          | Ramachandran, 1978<br>Petersen, 1989  |
| <i>Lasimorpha senegalensis</i>                             | 26                             | Petersen, 1989                        |
| <i>Lazarum (Typhonium) brownii</i>                         | c. 160                         | Petersen, 1989                        |
| <i>Lazarum (Typhonium) eliosurum</i>                       | c. 118,<br>130,<br>152,<br>168 | Petersen, 1989                        |
| <i>Lazarum brownii</i>                                     | c. 160                         | Petersen, 1989                        |

|                                                                   |                                |                                                |
|-------------------------------------------------------------------|--------------------------------|------------------------------------------------|
| <i>Lazarum eliosurum</i>                                          | c. 118,<br>130,<br>152,<br>168 | Petersen, 1989                                 |
| <i>Lemna aequinoctialis</i>                                       | 40                             | Landolt, 1986                                  |
| <i>Lemna disperma</i>                                             | 40                             | Landolt, 1986                                  |
| <i>Lemna gibba</i>                                                | 40                             | Landolt, 1986                                  |
| <i>Lemna japonica</i>                                             | 40                             | Landolt, 1986                                  |
| <i>Lemna minor</i>                                                | 40                             | Landolt, 1986                                  |
| <i>Lemna minuscula</i>                                            | 40                             | Landolt, 1986                                  |
| <i>Lemna obscura</i>                                              | 40                             | Landolt, 1986                                  |
| <i>Lemna perpusilla</i>                                           | 40                             | Landolt, 1986                                  |
| <i>Lemna trisulca</i>                                             | 40                             | Landolt, 1986                                  |
| <i>Lemna turionifera</i>                                          | 40                             | Landolt, 1986                                  |
| <i>Lemna valdiviana</i>                                           | 40                             | Landolt, 1986                                  |
| <i>Lysichiton americanus</i>                                      | 28                             | Petersen, 1989                                 |
| <i>Lysichiton camtschatcensis</i>                                 | 28                             | Sokolovskaya & Probatova, 1985                 |
| <i>Mangonia tweediana</i>                                         | <b>34</b>                      | Bogner & Petersen, 2007                        |
| <i>Monstera acuminata</i>                                         | 60                             | Petersen, 1989                                 |
| <i>Monstera adansonii</i>                                         | 60                             | Petersen, 1989                                 |
| <i>Monstera deliciosa</i>                                         | 24, 56,<br>58, 60              | Chaudhuri & Sharma, 1979<br>Huang et al., 1989 |
| <i>Monstera friedrichsthali</i>                                   | 60                             | Marchant, 1970                                 |
| <i>Monstera spruceana</i><br>( <i>Alloschemone occidentalis</i> ) | 60                             | Petersen, 1989                                 |
| <i>Montrichardia arborescens</i>                                  | 48                             | Petersen, 1989                                 |
| <i>Nephtytis afzelli</i>                                          | 60                             | Marchant, 1971a                                |
| <i>Nephtytis bintuluensis</i>                                     | 36                             | Hay, A., J. Bogner & P. C. Boyce 1994          |
| <i>Nephtytis hallaei</i>                                          | 40                             | Petersen, 1989                                 |
| <i>Nephtytis poissonii</i>                                        | 60                             | Marchant, 1971a                                |
| <i>Nephtytis swainei</i>                                          | 40                             | Petersen, 1989                                 |
| <i>Ooia (Piptospatha) grabowskii</i>                              | 26                             | Petersen, 1989                                 |
| <i>Orontium aquaticum</i>                                         | 13 26                          | Petersen, 1989<br>Petersen, 1989               |
| <i>Pedicellarum paiei</i>                                         | <b>24</b>                      | Bogner & Petersen, 2007                        |
| <i>Peltandra virginica</i>                                        | 112                            | Marchant, 1971a                                |
| <i>Philodendron andreanum</i>                                     | 32, 34                         | Sharma, 1970<br>Petersen, 1989                 |
| <i>Philodendron bipinnatifidum</i>                                | 18 36                          | Petersen, 1989                                 |
| <i>Philodendron cannifolium</i>                                   | 34                             | Petersen, 1989                                 |
| <i>Philodendron cordatum</i>                                      | 34                             | Petersen, 1989                                 |
| <i>Philodendron cuspidatum</i>                                    | 30 (32),<br>36                 | Chaudhuri & Sharma, 1979<br>Petersen, 1989     |
| <i>Philodendron erubescens</i>                                    | 32                             | Petersen, 1989                                 |
| <i>Philodendron eximium</i>                                       | 34                             | Petersen, 1989                                 |

|                                   |    |                                                                         |                                                                                                        |
|-----------------------------------|----|-------------------------------------------------------------------------|--------------------------------------------------------------------------------------------------------|
| <i>Philodendron giganteum</i>     |    | 30, 34                                                                  | Petersen, 1989                                                                                         |
| <i>Philodendron glandifolium</i>  |    | 34                                                                      | Petersen, 1989                                                                                         |
| <i>Philodendron gloriosum</i>     |    | 34                                                                      | Petersen, 1989                                                                                         |
| <i>Philodendron hastatum</i>      |    | 34                                                                      | Petersen, 1989                                                                                         |
| <i>Philodendron houlettianum</i>  |    | 32                                                                      | Petersen, 1989                                                                                         |
| <i>Philodendron imbe</i>          | 17 | 34                                                                      | Petersen, 1989                                                                                         |
| <i>Philodendron lacerum</i>       |    | 36                                                                      | Petersen, 1989                                                                                         |
| <i>Philodendron lacinosum</i>     |    | 32                                                                      | Petersen, 1989                                                                                         |
| <i>Philodendron lundii</i>        |    | 36                                                                      | Petersen, 1989                                                                                         |
| <i>Philodendron melinonii</i>     |    | 30                                                                      | Petersen, 1989                                                                                         |
| <i>Philodendron micans</i>        |    | 32                                                                      | Petersen, 1989                                                                                         |
| <i>Philodendron panduraeforme</i> |    | 34                                                                      | Petersen, 1989                                                                                         |
| <i>Philodendron pittieri</i>      |    | 34                                                                      | Petersen, 1989                                                                                         |
| <i>Philodendron radiatum</i>      |    | 32 + B                                                                  | Petersen, 1989                                                                                         |
| <i>Philodendron rugosum</i>       |    | 36                                                                      | Petersen, 1989                                                                                         |
| <i>Philodendron scandens</i>      |    | 30, 32                                                                  | Petersen, 1989                                                                                         |
| <i>Philodendron selloum</i>       |    | 32, 34,<br>36, 48                                                       | Subramanian & Munian, 1988<br>Subramanian & Munian, 1988<br>Chaudhuri & Sharma, 1979<br>Petersen, 1989 |
| <i>Philodendron sodiroi</i>       |    | 34                                                                      | Petersen, 1989                                                                                         |
| <i>Philodendron speciosum</i>     |    | 36                                                                      | Petersen, 1989                                                                                         |
| <i>Philodendron squamiferum</i>   |    | 26, 34                                                                  | Petersen, 1989                                                                                         |
| <i>Philodendron undulatum</i>     | 18 | 36                                                                      | Petersen, 1989                                                                                         |
| <i>Philodendron verrucosum</i>    | 17 | 34                                                                      | Petersen, 1989                                                                                         |
| <i>Philodendron warscewiczii</i>  |    | 34                                                                      | Petersen, 1989                                                                                         |
| <i>Philodendron wendlandii</i>    |    | 54                                                                      | Subramanian & Munian, 1988                                                                             |
| <i>Philonotium americanum</i>     |    | 26                                                                      | This paper                                                                                             |
| <i>Phymatarum borneense</i>       |    | 26, 28                                                                  | Petersen, 1989                                                                                         |
| <i>Pichinia disticha</i>          |    | 26                                                                      | This paper                                                                                             |
| <i>Pinellia cordata</i>           |    | 26, 72,<br>78                                                           | Li et al., 1997<br>Yi et al., 2005                                                                     |
| <i>Pinellia integrifolia</i>      |    | 78                                                                      | Yi et al., 2005                                                                                        |
| <i>Pinellia major</i>             |    | 20                                                                      | Petersen, 1989                                                                                         |
| <i>Pinellia pedatisecta</i>       |    | 26                                                                      | Li et al., 1997                                                                                        |
| <i>Pinellia peltata</i>           |    | 78                                                                      | Li et al., 1997                                                                                        |
| <i>Pinellia polyphylla</i>        |    | 26                                                                      | Yi et al., 2005                                                                                        |
| <i>Pinellia ternata</i>           |    | 28, 42,<br>54, 72,<br>78 90,<br>91, 99,<br>104,<br>108,<br>115,<br>116, | Li et al., 1997;<br>Cheng et al.; 1991<br>Gu & Hsu, 1991<br>Wang & Peng, 2000<br>Marchant, 1971b       |

|                                           |    |            |                                                                   |
|-------------------------------------------|----|------------|-------------------------------------------------------------------|
|                                           |    | 117,       |                                                                   |
|                                           |    | 128        |                                                                   |
| <i>Pinellia tripartita</i>                | 26 | 26, 52     | Petersen, 1989                                                    |
| <i>Pinellia yaoluopingensis</i>           |    | 26         | Li et al., 1997                                                   |
| <i>Piptospatha burbidgei</i>              |    | 26 + Bs    | Okada, 2000                                                       |
| <i>Piptospatha elongata</i>               |    | 26, 39     | Okada, 2000                                                       |
| <i>Piptospatha insignis</i>               |    | 26         | Petersen, 1989                                                    |
| <i>Piptospatha perakensis</i>             |    | 26         | Petersen, 1989                                                    |
| <i>Piptospatha ridleyi</i>                |    | 26         | Petersen, 1989                                                    |
| <i>Piptospatha ridleyi</i>                |    | 26         | Petersen, 1989                                                    |
| <i>Piptospatha truncatum</i>              |    | 26         | Okada, 2000                                                       |
| <i>Pistia stratiotes</i>                  | 12 | 14, 28     | Subramanian & Munian, 1988<br>Petersen, 1989                      |
| <i>Podolasia stipitata</i>                |    | 26         | Petersen, 1993                                                    |
| <i>Pothodium lobbianum</i>                |    | 24         | Petersen, 1989                                                    |
| <i>Pothos chapelieri</i>                  |    | 24         | Marchant, 1973                                                    |
| <i>Pothos scandens</i>                    | 12 | 24, 36     | Sarkar, 1991<br>Petersen, 1989                                    |
| <i>Pothos viridis</i>                     |    | 60         | Sharma, 1970                                                      |
| <i>Protarum sechellarum</i>               |    | 28         | Petersen, 1989                                                    |
| <i>Pseudodracontium lacourii</i>          |    | 26         | Petersen, 1989                                                    |
| <i>Pseudodracontium siamense</i>          |    | 26         | Petersen, 1989                                                    |
| <i>Pseudohydrosme gabunensis</i>          |    | Ca. 40     | Petersen, 1989                                                    |
| <i>Pycnospatha arietina</i>               |    | 26         | Petersen, 1989                                                    |
| <i>Pycnospatha arietina (soerensenii)</i> |    | 26         | Marchant, 1973                                                    |
| <i>Pycnospatha palmata</i>                |    | <b>26</b>  | Bogner & Petersen, 2007                                           |
| <i>Remusatia hookeriana</i>               |    | 28         | Gu et al., 1992                                                   |
| <i>Remusatia ornata</i>                   |    | 42         | Long et al., 1989                                                 |
| <i>Remusatia ornatus</i>                  |    | 30         | Kuruvilla et al., 1989                                            |
| <i>Remusatia pumila</i>                   |    | 20         | Li & Hay, 1992                                                    |
| <i>Remusatia pumila (sarmentosus)</i>     |    | 28         | Sharma, 1970                                                      |
| <i>Remusatia pumilus</i>                  |    | 28         | Petersen, 1989                                                    |
| <i>Remusatia vivipara</i>                 |    | 28, 42, 56 | Li & Hay, 1992<br>Marchant, 1971a                                 |
| <i>Rhaphidophora beccarii</i>             |    | 60         | Okada, 2000                                                       |
| <i>Rhaphidophora bogneri</i>              |    | 60         | Petersen, 1989                                                    |
| <i>Rhaphidophora celatocaulis</i>         |    | 56, 60     | Petersen, 1989<br>Marchant, 1970                                  |
| <i>Rhaphidophora decursiva</i>            |    | 26, 54, 56 | Chaudhuri & Sharma, 1979<br>Sarkar et al., 1976<br>Petersen, 1989 |
| <i>Rhaphidophora glauca</i>               |    | 56         | Chaudhuri & Sharma, 1979                                          |
| <i>Rhaphidophora lancifolia</i>           |    | 56         | Sharma, 1970                                                      |
| <i>Rhaphidophora peepla</i>               |    | 42, c. 120 | Sharma, 1970<br>Petersen, 1989                                    |

|                                                              |                        |                                            |
|--------------------------------------------------------------|------------------------|--------------------------------------------|
| <i>Rhaphidophora pteropoda</i>                               | 60                     | Petersen, 1989                             |
| <i>Rhodospatha blanda</i>                                    | 56 + f                 | Petersen, 1989                             |
| <i>Rhodospatha hastata</i>                                   | 60                     | Petersen, 1989                             |
| <i>Rhodospatha picta</i>                                     | 28                     | Petersen, 1989                             |
| <i>Sauromatum (Typhonium)</i><br><i>diversifolium</i>        | 52                     | Mehra & Sachdeva, 1976                     |
| <i>Sauromatum (Typhonium)</i><br><i>giganteum</i>            | 52                     | Petersen, 1989                             |
| <i>Sauromatum</i><br><i>gaoligongense</i>                    | 26                     | Cusimano et al., 2010                      |
| <i>Sauromatum giganteum</i><br><i>(Typhonium giraldii)</i>   | 54                     | Petersen, 1989                             |
| <i>Sauromatum guttatum</i>                                   | 26                     | Chaudhuri & Sharma, 1979                   |
| <i>Sauromatum hirsutum</i>                                   | 26                     | Cusimano et al., 2010                      |
| <i>Sauromatum horsfieldii</i><br><i>(Typhonium larsenii)</i> | 26                     | Petersen, 1989                             |
| <i>Sauromatum tentaculatum</i>                               | 26                     | Cusimano et al., 2010                      |
| <i>Sauromatum venosum</i>                                    | 26, 52,<br>104         | Sarkar, A. K. 1991                         |
| <i>Scaphispatha gracilis</i>                                 | 28                     | Petersen, 1989                             |
| <i>Schismatoglottis bulbifera</i>                            | 26                     | Okada, 2000                                |
| <i>Schismatoglottis</i><br><i>calyptrata</i>                 | 26                     | Okada, 1982                                |
| <i>Schismatoglottis celebica</i>                             | 26                     | Okada, 2000                                |
| <i>Schismatoglottis erecta</i>                               | 26                     | Okada, 2000                                |
| <i>Schismatoglottis hayana</i>                               | <b>26</b>              | Bogner & Petersen, 2007                    |
| <i>Schismatoglottis</i><br><i>homalomenoidea</i>             | 26                     | Okada, 2000                                |
| <i>Schismatoglottis irrorata</i>                             | 52 + Bs                | Okada, 2000                                |
| <i>Schismatoglottis lancifolia</i>                           | 26 +<br>Bs, 39<br>+ Bs | Okada, 2000                                |
| <i>Schismatoglottis</i><br><i>multiflora</i>                 | 26                     | Okada, 2000                                |
| <i>Schismatoglottis</i><br><i>parvifolia</i>                 | 26                     | Okada, 2000                                |
| <i>Schismatoglottis picta</i>                                | 30, 52                 | Sharma, 1970<br>Petersen, 1989             |
| <i>Schismatoglottis</i><br><i>roseospatha</i>                | 26                     | Petersen, 1989                             |
| <i>Schismatoglottis tecturata</i>                            | 52                     | Petersen, 1989                             |
| <i>Schismatoglottis triandra</i>                             | 26                     | Petersen, 1989                             |
| <i>Schismatoglottis wallichii</i>                            | 26                     | Petersen, 1989                             |
| <i>Schottariella mirifica</i>                                | --                     | Not counted                                |
| <i>Scindapsus aureus</i>                                     | 48                     | Subramanian & Munian, 1988<br>Sharma, 1970 |
| <i>Scindapsus hederaceus</i>                                 | 64                     | Okada, 1982                                |
| <i>Scindapsus latifolius</i>                                 | 58                     | Petersen, 1989                             |
| <i>Scindapsus lucens</i>                                     | 60                     | Petersen, 1993                             |
| <i>Scindapsus megaphyllus</i>                                | 56                     | Huang et al., 1989                         |

|                                           |    |                |                                                  |
|-------------------------------------------|----|----------------|--------------------------------------------------|
| <i>Scindapsus officinalis</i>             |    | 56             | Chaudhuri & Sharma, 1979                         |
| <i>Scindapsus perakensis</i>              |    | 60             | Petersen, 1989                                   |
| <i>Scindapsus pictus</i>                  |    | 60, 70,<br>112 | Sharma, 1970<br>Petersen, 1989                   |
| <i>Spathantheum<br/>intermedium</i>       |    | 34             | Bogner, 1997                                     |
| <i>Spathantheum<br/>orbignyanum</i>       |    | 34             | Petersen, 1993                                   |
| <i>Spathicarpa sagittifolia</i>           | 17 | 34             | Petersen, 1989                                   |
| <i>Spathiphyllum<br/>cannaefolium</i>     | 15 | 30             | Jos & Rajendran, 1976<br>Petersen, 1989          |
| <i>Spathiphyllum<br/>cochlearispathum</i> |    | 30             | Damerval, 1980                                   |
| <i>Spathiphyllum<br/>commutatum</i>       |    | c. 30          | Petersen, 1989                                   |
| <i>Spathiphyllum<br/>floribundum</i>      | 30 | 30, 60         | Petersen, 1989                                   |
| <i>Spathiphyllum<br/>friedrichsthali</i>  |    | 30             | Marchant, 1973                                   |
| <i>Spathiphyllum<br/>grandifolium</i>     |    | 30             | Petersen, 1989                                   |
| <i>Spathiphyllum<br/>harveyanum</i>       | 15 | 30             | Petersen, 1989                                   |
| <i>Spathiphyllum patinii</i>              | 9  | 18, 30         | Petersen, 1989                                   |
| <i>Spathiphyllum wallisii</i>             |    | 30             | Petersen, 1989                                   |
| <i>Spirodela intermedia</i>               |    | 30             | Landolt, 1986                                    |
| <i>Spirodela polyrriza</i>                |    | 30             | Landolt, 1986                                    |
| <i>Stenospermatium<br/>popayanense</i>    |    | 28             | Petersen, 1989                                   |
| <i>Stenospermatium<br/>popayense</i>      |    | 28             | Marchant, 1970                                   |
| <i>Stenospermatium robustum</i>           |    | 28             | Petersen, 1989                                   |
| <i>Stenospermatium<br/>sodiroanum</i>     |    | 28             | Petersen, 1989                                   |
| <i>Stuednera colocasiifolia</i>           |    | 36             | Sharma, 1970                                     |
| <i>Stuednera colocasioides</i>            |    | 28             | Kuruvilla et al., 1989                           |
| <i>Stuednera discolor</i>                 | 16 | 56             | Jos et al., 1971<br>Petersen, 1989               |
| <i>Stuednera henryana</i>                 |    | 28             | Petersen, 1993                                   |
| <i>Stylochaeton bogneri</i>               |    | 56             | Petersen, 1989                                   |
| <i>Stylochaeton puberulus</i>             |    | 28             | Petersen, 1989                                   |
| <i>Stylochaeton salaamicus</i>            |    | 28             | Petersen, 1989                                   |
| <i>Stylochaeton zenkeri</i>               |    | 56             | Petersen, 1989                                   |
| <i>Symplocarpus foetidus</i>              |    | 60             | Blair, A. 1975                                   |
| <i>Symplocarpus renifolius</i>            |    | 30, 60         | Sokolovskaya & Probatova, 1985<br>Petersen, 1989 |
| <i>Synandropadix<br/>vermitoxicus</i>     | 17 | 34             | Petersen, 1989                                   |
| <i>Syngonium albolineatum</i>             |    | 22             | Subramanian & Munian, 1988                       |
| <i>Syngonium auritum</i>                  |    | 24             | Guha & Bhattacharya, 1987                        |

|                                             |    |               |                                                                       |
|---------------------------------------------|----|---------------|-----------------------------------------------------------------------|
| <i>Syngonium erythrophyllum</i>             |    | 28            | Petersen, 1989                                                        |
| <i>Syngonium hastifolium</i>                |    | 28            | Sharma, 1970                                                          |
| <i>Syngonium macrophyllum</i>               |    | 24            | Guha & Bhattacharya, 1987                                             |
| <i>Syngonium podophyllum</i>                | 12 | 24, 26        | Guha & Bhattacharya, 1987; Petersen, 1989                             |
| <i>Syngonium steyermarkii</i>               |    | 28            | Petersen, 1989                                                        |
| <i>Syngonium vellozianum</i>                |    | 26            | Marchant, 1971b                                                       |
| <i>Syngonium wendlandii</i>                 |    | 24            | Guha & Bhattacharya, 1987                                             |
| <i>Taccarum weddellianum</i>                |    | 34            | Petersen, 1989                                                        |
| <i>Theriophonum dalzellii</i>               | 8  | 16            | Jayalakshmi, 1994<br>Petersen, 1989                                   |
| <i>Theriophonum indicum</i>                 | 8  | 16            | Ramachandran, 1978                                                    |
| <i>Theriophonum infaustum</i>               |    | 16            | Ramachandran, 1978                                                    |
| <i>Theriophonum minutum</i>                 | 8  | 14, 16,<br>24 | Ramachandran, 1978<br>Subramanian & Munian, 1988<br>Jayalakshmi, 1994 |
| <i>Theriophonum sivaganganum</i>            |    | 32            | Jayalakshmi, 1994                                                     |
| <i>Typhonium baoshanense</i>                |    | 10            | Zhin-Lin et al., 2007                                                 |
| <i>Typhonium blumei</i>                     |    | 52            | Wang & Yang, 1996                                                     |
| <i>Typhonium bulbiferum</i>                 | 10 | 20            | Ramachandran, 1978<br>Petersen, 1989                                  |
| <i>Typhonium flagelliforme</i>              | 8  | 16            | Petersen, 1989                                                        |
| <i>Typhonium flagelliforme (cuspidatum)</i> | 8  | 16            | Ramachandran, 1978                                                    |
| <i>Typhonium inopinatum</i>                 | 13 | 26            | Petersen, 1989                                                        |
| <i>Typhonium jinpingense</i>                |    | 10            | Zhoglang et al., 2002                                                 |
| <i>Typhonium roxburghii</i>                 |    | (26), 52      | Petersen, 1989                                                        |
| <i>Typhonium roxburghii (divaricatum)</i>   | 26 | 16, 52,<br>65 | Ramachandran, 1978<br>Jos et al., 1971                                |
| <i>Typhonium trilobatum</i>                 |    | 18, 26,<br>36 | Ramachandran, 1978<br>Chaudhuri & Sharma, 1979                        |
| <i>Typhonodorum lindleyanum</i>             |    | 112           | Petersen, 1989                                                        |
| <i>Ulearum donburnsii</i>                   |    | <b>14</b>     | Bogner & Petersen, 2007                                               |
| <i>Ulearum viridispadix</i>                 |    | 14            | Petersen, 1989                                                        |
| <i>Urospatha sagittifolia</i>               |    | 52            | Petersen, 1989                                                        |
| <i>Wolffia angusta</i>                      |    | 40            | Landolt, 1986                                                         |
| <i>Wolffia arrhiza</i>                      |    | 40            | Landolt, 1986                                                         |
| <i>Wolffia australiana</i>                  |    | 20, 40        | Landolt, 1986                                                         |
| <i>Wolffia borealis</i>                     |    | 40            | Landolt, 1986                                                         |
| <i>Wolffia brasiliensis</i>                 |    | 40            | Landolt, 1986                                                         |
| <i>Wolffia columbiana</i>                   |    | 40            | Landolt, 1986                                                         |
| <i>Wolffia globosa</i>                      |    | 40            | Landolt, 1986                                                         |
| <i>Wolffia microscopica</i>                 |    | 40            | Landolt, 1986                                                         |
| <i>Wolffiella denticulata</i>               |    | 20, 40        | Landolt, 1986                                                         |
| <i>Wolffiella gladiata</i>                  |    | 40            | Landolt, 1986                                                         |
| <i>Wolffiella hyalina</i>                   |    | 40            | Landolt, 1986                                                         |
| <i>Wolffiella lingulata</i>                 |    | 20, 40        | Landolt, 1986                                                         |
| <i>Wolffiella neotropica</i>                |    | 40            | Landolt, 1986                                                         |



|                                   |       |                                       |
|-----------------------------------|-------|---------------------------------------|
| <i>Wolffiella oblonga</i>         | 40    | Landolt, 1986                         |
| <i>Wolffiella welwitschii</i>     | 40    | Landolt, 1986                         |
| <i>Xanthosoma alrovirens</i>      | 26    | Marchant, 1971a                       |
| <i>Xanthosoma brasiliense</i>     | 26    | Petersen, 1989                        |
| <i>Xanthosoma helleborifolium</i> | 39    | Petersen, 1989                        |
| <i>Xanthosoma mariae</i>          | 26    | Bogner & Petersen, 2007               |
| <i>Xanthosoma nigrum</i>          | c. 26 | Petersen, 1989                        |
| <i>Xanthosoma pentaphyllum</i>    | 26    | Petersen, 1989                        |
| <i>Xanthosoma plowmanii</i>       | 26    | Petersen, 1989                        |
| <i>Xanthosoma robustum</i>        | 13    | Petersen, 1989                        |
| <i>Xanthosoma sagittifolium</i>   | 26    | Udengwu & Okafor, 1999                |
| <i>Xanthosoma striatipes</i>      | 22    | Petersen, 1993                        |
| <i>Xanthosoma violaceum</i>       | 26    | Udengwu & Okafor, 1999                |
| <i>Zamioculcas zamiifolia</i>     | 17    | 34 Petersen, 1989                     |
| <i>Zantedeschia aethiopica</i>    | 16    | 32 Yao et al., 1994<br>Petersen, 1989 |
| <i>Zantedeschia albo-maculata</i> | 16    | 32 Petersen, 1989                     |
| <i>Zantedeschia elliottiana</i>   | 16    | 32 Yao et al., 1994; Petersen, 1989   |
| <i>Zantedeschia odorata</i>       |       | 32 Yao et al., 1994                   |
| <i>Zantedeschia pentlandii</i>    |       | 32 Yao et al., 1994                   |
| <i>Zantedeschia rehmannii</i>     | 16    | 32 Yao et al., 1994; Petersen, 1989   |
| <i>Zantedeschia tropicalis</i>    |       | 32 Marchant, 1971a                    |
| <i>Zomicarpa pythonium</i>        |       | 22 Petersen, 1989                     |
| <i>Zomicarpa riedelianum</i>      |       | 20 Petersen, 1989                     |
| <i>Zomicarpella amazonica</i>     |       | 26 Bogner, 1997                       |

## REFERENCES

- Aboucaya, A. & R. Verlaque 1990.** IOPB chromosome data 2. International Organization of Plant Biosystematists Newsletter 15: 10-11.
- Ae, T. C. 1975.** Cytotaxonomic studies on *Arisaema*. Journal of Korean Research Institute for Better Living 14: 165-174.
- Alpinar, K. 1986.** Some observations and findings on *Arum* L. (Araceae) species of west Turkey. Doga, Tauurk Biyol. Dergisi (Turkish J. Biol.) 10: 240--253. (In Turkish).
- Alpinar, A. 1987.** Chromosome Number Reports 94. Taxon 36: 285.
- Ankei, T. 1987.** Morphology and chromosome numbers of Araceae in Iriomote Island, Okinawa. Biological Magazine (Okinawa) 25: 1-11.
- Arends, J. & F. van der Laan 1978.** Somatic Chromosome Numbers in *Lagenandra* Dalzell Meded. Landbouwhogeschool Wageningen 78-13. 46-48.
- Arends, J. C. & F. M. van der Laan 1982.** Somatic chromosome numbers in *Anubias* Schott. Aroideana 5: 3-7.
- Athnasiou, K. & G. Kamari 1992.** Mediterranean chromosome number reports 2 (61--63). Flora Mediterranea 2: 236-239.
- Bedalov, M. 1969.** Broj kromosoma vrste *Biarum tenuifolium* (L.) Schott. Acta Botanica Croatica 28: 39-41.

- Bedalov, M. 1972.** Novi Broj Kromosoma za vrstu *Dracunculus vulgaris* Schott. Acta Bot. Croat. 31:87-89.
- Bedalov, M. 1975.** Cytotaxonomical and phytogeographical investigation of the species *Arum italicum* Mill. In Jugoslavia. Acta Bot. Croat. 34: 143-150.
- Bedalov, M. 1977.** Citotaksonomska i biljnogeografska istraživanja vrste *Arum maculatum* L. u Jugoslaviji. Acta Bot. Croat. 36:107-117.
- Bedalov, M. 1978.** 2317. Bulletin de la Société Neuchâteloise de Sciences Naturelles 101: 85-93.
- Bedalov, M., C. Dragulescu & P. Küpfer 1998.** IOPB chromosome data 13. Newslett. Int. Organ. Pl. Biosyst. (Oslo) 29: 17.
- Bedalov, M. & A. Terpo 1998.** IOPB chromosome data 13. Newslett. Int. Organ. Pl. Biosyst. (Oslo) 29: 18.
- Bedalov, M., Küpfer, P. 2006.** Studies on the genus *Arum* (Araceae). Aroideana 29:108-131.
- Bhattacharya, G. N. 1976.** A cytological study on the tribe Anthurieae (Araceae). Bulletin of the Botanical Society of Bengal. 30: 51-56.
- Bhattacharya, G. N. 1978.** Evolutionary role of B-chromosomes in *Arisaema* (Araceae). Proceedings of the Indian Science Congress Association (IV, B) 67: 127.
- Bianco, P., S. D'Emerico, P. Medagli & M. Bedalov 1993.** Osservazioni biosistematiche su *Arum apulum* (Carano) Bedalov, endemismo pugliese. Giornale Botanico Italiano 127(3): 509.
- Blair, A. 1975.** Karyotype of five plant species with disjunct distributions in Virginia and the Carolinas. American Journal of Botany 62: 833-837.
- Bogner, J. 1985.** A new *Chlorospatha* species from Colombia. Aroideana 8: 49-54.
- Bogner, J. 1997.** New taxa of Araceae. Sendtnera 4: 5-12.
- Bogner, J. 2008.** The chromosome numbers of the Aroid genera: An additional note Aroideana 31: 113.
- Bogner, J., Petersen, G. 2007.** The chromosome numbers of the aroid genera. Aroideana 30:82-90.
- Bogner, J. 2008.** The genus *Bognera* Mayo & Nicolson (Araceae). Aroideana 31: 3-14.
- Borzatti von Löwenstern, A. & F. Garbari 1999.** Mediterranean chromosome number reports 9 (1099--1105). Flora Mediterranea 9: 379-387.
- Boyce, P., Athanasiou, K. 1991.** A new subspecies of *Biarum tenuifolium* (Araceae) from Crete. Flora Medit. 1:5-13.
- Carvaheira, G. M. G., M. Guerra, G. A. dos Santos, V. C. de Andrade & M. C. A. de Farias 1991.** Citogenética de angiospermas coletadas em Pernambuco---IV. Acta Botanica Brasilica 5(2): 37-51.
- Chaudhuri, J. B. & A. Sharma. 1979.** Chromosome studies in certain members of Araceae. Genética Ibérica 30-31: 161-188.
- Chauhan, K.P.S. & P.E. Brandham 1985.** The significance of Robertsonian fusion and monosomy in *Cardiocrinum* (Liliaceae). Kew Bulletin 40: 567-571.
- Cheng, Y.-c., B.-k. Liu, Z.-s. Jiang & Y.-c. Duan 1991.** Observations of chromosome numbers of several medical plants. J. Hunan Agric. Coll. 11(2): 166-170.
- Cusimano, N., Barrett, M.D., Hettterscheid, W.L.A., Renner, S.S. 2010.** A phylogeny of the Areae (Araceae) implies that *Typhonium*, *Sauromatum*, and the Australian species of *Typhonium* are distinct clades. Taxon 59: 439-447.
- Damerval, C. 1980.** Contribution a l'etude caryosystematique des Aracees. Revue de Cytologie et de Biologie Végétales, le Botaniste 3: 291-300.
- Damerval, C. 1980.** Contribution a l'etude caryosystematique des Aracees. Revue de Cytologie et de Biologie Végétales, le Botaniste 3: 291-300.

- D'Emerico, A., Bianco, P., Medagli, P. 1993.** Chromosome numbers and karyotypes in *Arum* (Araceae). *Caryologia* 46 (2-3): 161-170.
- De Sarker, D. & W. L. A. Hetterscheid 1997.** Notes on the genus *Amorphophallus* (Araceae), 9: cytological investigation of *Amorphophallus (Plesmonium) margaritifera* (Roxb.) Kunth. *Aroideana* 20: 11-12.
- Diosdado, J. C., C. Santa-Bárbara, J. Vioque, R. Juan & J. Pastor 1993.** Números cromosómicos para la flora Española. 691-719. *Lagasalia* 17: 173-184.
- Elena Rossello, J. & F. Gallego 1984.** Estudios cariológicos sobre algunas plantas extremadurenses. *Studia Botanica, Universidad de Salamanca* 3: 325-327.
- Fernandez, A. 1977.** Numeros cromosomicos en Angiospermas. *Hickenia* 1: 83-86.
- Fernandez Casas, J., S. Pajaron & M. L. Rodriguez Pascual. 1978.** In Numeros cromosomicos para la flora Espanola. 45-83. *Lagasalia* 8: 105-125.
- Fernandez Piqueras, J. & M. Ruiz Rujon. 1976.** Estudios cariológicos sobre la flora española. *Boletim da Sociedade Broteriana, ser. 2* 50: 5-13.
- Geber, G. & D. Schweizer 1988.** Cytochemical heterochromatin differentiation in *Sinapis alba* (Cruciferae) using a simple air-drying technique for producing chromosome spreads. *Plant Systematics and Evolution* 158: 97-106.
- Giordano, C. 1999.** Karyological and palynological observations on *Amorphophallus titanum* (Becc.) Becc. ex Arcangeli (Araceae). *Caryologia* 52: 65-73.
- Gireesh, T. & K. V. Bhavanandan 1994.** Karyomorphological studies in *Dieffenbachia*. *Journal of Cytology and Genetics* 29(2): 177-186.
- Gu, Z.-J. & H. Sun 1998.** The chromosome report of some plants from Motuo, Xizang (Tibet). *Acta Botanica Yunnanica* 20(2): 207-210.
- Gu, Z.-J., L. Wang & H. Li 1992.** Karyomorphological studies of some monocots in Dulongjiang area. *Acta Botanica Yunnanica Suppl.* 5: 77-90.
- Guerra, M. dos S. 1986.** Citogenética de Angiospermas coletadas em Pernambuco, I. *Revista Brasileira de Genética* 9: 21-40.
- Guha, M. & G. N. Bhattacharya 1987.** Chromosomes of four species of the genus *Syngonium* Schott (Araceae). *Proceedings of the Indian Science Congress Association* 74(3,VI): 198.
- Hay, A., J. Bogner & P. C. Boyce 1994.** *Nephtytis* Schott (Araceae) in Borneo: a new species and new generic record for Malesia. *Novon* 4(4): 365-368.
- Hetterscheid, W. L. A., S. Ittenbach & J. Bogner 1999.** Notes on the genus *Amorphophallus* (Araceae). 10. Revision of the endemic *Amorphophallus* species of Madagascar. *Botanische Jahrbücher für Systematik, Pflanzengeschichte und Pflanzengeographie* 121(1): 1-17.
- Hill, L. M. 1995.** IOPB chromosome data 10. *International Organization of Plant Biosystematists Newsletter* 25: 8-9.
- Hong, D.-Y. & S.-Z. Zhang 1990.** Observations on chromosomes of some plants from western Sichuan. *Cathaya* 2: 191-197.
- Huang, S.-F., Z.-F., Zhao, Z.-Y. Chen, S.-J. Chen & X.-X. Huang 1989.** Chromosome counts on one hundred species and infraspecific taxa. *Acta Botanica Austro Sinica* 5: 161-176.
- Huang, T.C. & M.J. Wu 1997.** Notes on the Flora of Taiwan (30)-*Arisaema nanjenense* T.-C. Huang & M.-J. Wu sp. nov. (Araceae). *Taiwania* 42(3): 165-173.
- Ishida, G. & Y. Akagi 2000.** Chromosome observations of *Amorphophallus konjac* cultivars. *Bulletin of the Hiroshima Botanical Garden* 19: 1-5.
- Jacobsen, N. 1976.** Notes on *Cryptocoryne* of Sri Lanka (Ceylon). *Botaniska Notiser* 129: 179-190.

- Jacobson, N. 1977.** Chromosome numbers and taxonomy in *Cryptocoryne* (Araceae). Botaniska Notiser 130: 71-87.
- Jayalakshmi, S. K. 1994.** Karyomorphology in some species of *Therioophonum* from south India. Journal of Cytology and Genetics 29(2): 209-213.
- Johnson, M. A. T. & P. E. Brandham 1997.** New chromosome numbers in petaloid monocotyledons and in other miscellaneous angiosperms. Kew Bulletin 52(1): 121-138.
- Jos, J.S. & P.G. Rajendran 1976.** Occurrence and behavior of supernumerary chromosomes in *Spathiphyllum cannifolium* Schott (Araceae). Genética Ibérica 28(1/2): 47-56.
- Kamari, G., Felber, F., Garbari, F. 1999.** Mediterranean chromosome number reports 9. Flora Mediterranea 9: xx-xx.
- Kapoor, B. M. 1982.** In IOPB chromosome number reports LXXIV. Taxon 31: 119-120.
- Kartashova, N.N., L.A. Malakhova, Koslova & N.A. Dubrova. 1974.** Chisla chromosom u rjada polesnykh rastenij is prirodnykh populjacij flory Priob'ja. Biol. Biofis. Tomsk 47-53.
- Ko, S.-C. & Y.-S. Kim 1985.** A taxonomic study of *Arisaema* in Korea. Korean Journal of Plant Taxonomy 15: 67-109.
- Ko, S.C., K.H. Tae, T.O. Kwon & Y.S. Kim 1987.** A cytotoxic study on some species of *Arisaema*. Korean Journal of Plant Taxonomy 17: 189-205.
- Kuruvilla, K. M., B. Dutt & R. P. Roy 1989.** Karyomorphological investigations on aroids of North-Eastern Hills. Journal of Cytology and Genetics 24: 13-22.
- Landolt, E. 1986.** The family of Lemnaceae – a monographic study Vol. 2 (No. 71). Vol. 1 of the monograph: Morphology; karyology; ecology; geographic distribution; systematic position; nomenclature; descriptions, pp. 129 - 136. Publisher: Veröff. Geobot. Inst. ETH, Stiftung Rübél, Zürich; 566 pp.
- Larsen, K. & S. S. Larsen. 1974.** A new *Amorphophallus* from Thailand. Reinwardtia 9: 139-142.
- Lee, Y. N. 1967.** Chromosome numbers of flowering plants in Korea. J. Korean Res. Inst. Ewha Women's Univ. 11: 455-478.
- Li, H. & A. Hay 1992.** Notes on the classification of genera *Remusatia* and *Gonatanthus* in Araceae. Acta Botanica Yunnanica, Suppl. 5: 27-33.
- Li, M.-w., D.-x. Gu, Y.-i. Liu & P.-s. Hsu 1997.** Relationship between occurrence of bulbils and chromosome number and ploidy in *Pinellia* (Araceae). Acta Phytotaxonomica Sinica 35(3): 208-214.
- Lijima, M. 1982.** On the chromosomes of *Arisaema serratum* from Hachijo Island. Journal of Japanese Botany 57: 317.
- Liu, P. Y., D. P. Zhang & L. Zhao 1985.** The karyotype analysis and protein study of two species of *Amorphophallus*. J. SouthW. Agric. Univ. (4): 39-43.
- Lobin, W., Boyce, P. 1991.** *Eminium koenenianum* (Araceae), a new species from NE Turkey and a key to the genus *Eminium*. Willdenowia 20: 43-51.
- Long, C.-l., H. Li, X.-z. Liu & Z.-j. Gu 1989.** A cytogeographic study on the genus *Remusatia* (Araceae). Acta Botanica Yunnanica 11(2): 132-138.
- Marchant, C.J. 1970.** Chromosome variation in Araceae: I Pothoeae to Stylochitoneae. Kew Bulletin 24: 315-322.
- Marchant, C.J. 1971a.** Chromosome variation in Araceae: II Richardieae to Colocasieae. Kew Bulletin 25: 47-56.
- Marchant, C.J. 1971b.** Chromosome variation in Araceae: III Philodendreae to Pythoniëae. Kew Bulletin 25: 323-329.
- Marchant, C.J. 1972.** Chromosome variation in Araceae: IV Areae. Kew Bulletin 26: 395-404.
- Marchant, C.J. 1973.** Chromosome variation in Araceae: V Acoreae to Lasieae. Kew Bulletin 28: 199-210.

- Marutani, M. & H. Kamemoto 1983.** Transmission and significance of B Chromosomes in *Anthurium warocqueanum*. *American Journal of Botany* 70: 40-46.
- Marutani, M., R. D. Sheffer & H. Kamemoto 1993.** Cytological analysis of *Anthurium andraeanum* (Araceae), its related taxa and their hybrids. *American Journal of Botany* 80(1): 93-103.
- Marutani, M., S. Wannakrairoj & H. Kamemoto 1988.** Chromosome studies on *Anthurium amnicola* and its hybrids. *Aroideana* 11: 9-14.
- Mehra, P. N. & S. K. Sachdeva 1975.** In IOPB chromosome number reports XLIX. *Taxon* 24: 501-516.
- Mehra, P. N. & S. K. Sachdeva 1976.** Cytological observations on some west Himalayan monocots. V. Araceae. *Cytologia* 41: 55-61.
- Mehra, P. N. & S. K. Sachdeva 1979.** Cytological observations on some East-Himalayan monocots. *Cytologia* 44: 233-240.
- Murata, J. & J. Ohno 1989.** *Arisaema ehimense* J. Murata et Ohno (Araceae), a new species from Shikoku, Japan, of putative hybrid origin. *Journal of Japanese Botany* 64: 341-351.
- Murata, J. 1983.** *Arisaema aprile* (Araceae), a new species from Honshu, Japan. *Journal of Japanese Botany* 58: 29-32.
- Murata, J. & M. Iijima 1983.** New or noteworthy chromosome records in *Arisaema*. *Journal of Japanese Botany* 58(9): 270--280.
- Murata, J. 1990.** New or noteworthy chromosome records in *Arisaema* (Araceae) (2). *Journal of Japanese Botany* 65: 225-232.
- Murata, J., Murata, H., Sugawara, T., Yang, Y., Wu, S. 2006.** New or noteworthy chromosome records in *Arisaema* (Araceae) (3). *J. Jpn. Bot* 81:20-25.
- Nguyen, V. X., H. Yoshino & M. Tahara 1998.** Karyotype analyses on diploid and tetraploid of *Alocasia odora* (Roxb.) K. Koch. *Aroideana* 21: 8-12.
- Oginuma, K., R. Kiaptranis, K. Damas & H. Tobe 1998.** A cytological study of some plants from Papua New Guinea. *Acta Phytotaxonomica et Geobotanica* 49: 105-114.
- Okada, H. 1982.** Chromosome counts of some plants collected from West Sumatra. *Forest Ecology and Flora of G. Gadut, West Sumatra*.
- Okada, H. 2000.** Karyological studies on some rhoephytic aroids (Araceae) in the Malesian wet tropics. *Acta Phytotaxonomica et Geobotanica* 51: 177-186.
- Patil, K.S., Dixit, G.B. 1995.** Cytological states in Araceae: Part 1. *Aroideana* 18:40-45.
- Petersen, G. 1989.** Cytology and systematic of Araceae. *Nor. J. Bot.* 9:119-166.
- Petersen, G. 1992.** In J. Bogner & W. L. A. Hettterscheid, Notes on the genus *Amorphophallus* (Araceae) I. Three new species from tropical Asia. *Blumea* 36: 467-475.
- Petersen, G. 1993.** New chromosome numbers in Araceae. *Willdenowia* 23: 239-244.
- Popova, M. & I. Ceschmedjiev 1978.** In IOPB chromosome number reports LXI. *Taxon* 27: 375-392.
- Pringle, J. S. 1979.** Documented plant chromosome numbers 1979: 1. *Sida* 8: 119-120.
- Ramachandran, K. 1978.** Cytological studies on South Indian Araceae. *Cytologia* 43: 289-303.
- Sachdeva, S. K. 1977.** In IOPB chromosome number reports LVI. *Taxon* 26: 257-274.
- Sampathkumar, R. & K. R. Ayyangar. 1981.** In Chromosome number reports LXXII. *Taxon* 30: 695.
- Sarkar, A. K. 1975.** Studies on the mode of evolution in *Caladium bicolor* Vent. (Araceae). *Proceedings of the Indian Science Congress Association* 62: 125.
- Sarkar, A. K. 1976.** Further cytological investigations of *Caladium bicolor* Vent. (Araceae). *Proceedings of the Indian Science Congress Association* 63: 123.

- Sarkar, A. K. 1991.** Studies on the cyto-ecological correlations of some araceous taxa occurring in different habitat. Proceedings of the Indian Science Congress Association 78(3,VIII): 136-137.
- Sarkar, A. K., N. Datta, R. Mallick & U. Chatterjee 1976.** In IOPB chromosome number reports LIV. Taxon 25: 631-649.
- Sarkar, A. K. & N. Datta 1978.** Cytological assessment of Indian *Iphigenia* (Liliaceae) to ascertain their mode of speciation. Bulletin of the Botanical Society of Bengal 32: 59-62.
- Scrugli, A. 1977.** Numeri cromosomici per la flora Italiana: 331-347. Informatore Botanico Italiano 9: 116-125.
- Serizawa, S. 1980.** Studies on the genus *Arisaema* in Japan (1). Group of *Arisaema undulatifolium*. Journal of Japanese Botany 55: 148-156.
- Serizawa, S. 1981.** Studies on the genus *Arisaema* in Japan (4) *Arisaema amurense* group and *A. longipedunculatum* group. Acta Phytotaxonomica et Geobotanica 32: 22-30.
- Sharma, A.K., Mukhopadhyay, S. 1963.** Chromosome studies in *Typhonium* and *Arisaema* with a view to find out the mode of origin and Affinity of the two. Cytologia 30:58-66.
- Sheffer, R. D. & H. Kamemoto. 1976.** Chromosome numbers in the genus *Anthurium*. American Journal of Botany 63: 74-81.
- Sheffer, R.D., Croat, T.B. 1983.** Chromosome numbers in the genus *Anthurium* (Araceae) II. Amer. J. Bot. 70: 858-871.
- Sokolovskaya, A. P. & N. S. Probatova 1985.** Chromosome numbers in the vascular plants from the Primorye territory, Kamchatka, region, Amur valley and Sakhalin. Botaniceskij Žurnal SSSR 70: 997-999.
- Šopova, M. & Ž. Sekovski 1989.** Chromosome atlas of some Macedonian angiosperms. V. Godišen Zbornik Biologija Prirodno-Matematički Fakultet na Univerzitetot Kiril i Metodij 39--40: 353-365.
- Sreekumari, M. T. & P. M. Mathew 1991.** Effect of colchicine treatment in a triploid variety of taro [*Colocasia esculenta* (L.) Schott]. New Botanist 18: 211-215.
- Srivastava, V. K. 1982.** Chromosomal variations in cultivated chrysanthemums. Nucleus 25: 43-59.
- Subramanian, D. 1979.** Cytological studies in *Colocasia antiquorum* Schott. Journal of Cytology and Genetics 14: 179-184.
- Subramanian, D., Munian, M. 1988.** Cytotaxonomical studies in South Indian Araceae. Cytologia 53: 59-66.
- Sun, Y.-g. 1999.** Study on the chromosome and karyotype of *Amorphophallus sinensis* Belval. J. Anhui Norm. Univ., Nat. Sci. Ed. 22: 329-331, 337.
- Talavera, S. 1976.** Revision de las especies españolas del genero *Biarum* Schott. Lagasalia 6: 275-296.
- Tanimoto, T. & T. Matsumoto. 1986.** Variations of morphological characters and isozyme patterns in Japanese cultivars of *Colocasia esculenta* Schott and *C. gigantea* Hook. Japanese Journal of Breeding 36: 100-111.
- Udengwu, O. S. & N. A. Okafor 1999.** Karyomorphological studies of five edible *Colocasia* and *Xanthosoma* species. Nucleus 42: 39-44.
- Uotila, P. & K. Pellinen 1985.** Chromosome numbers in vascular plants from Finland. Acta Botanica Fennica 130.
- Van Loon, J. C. 1982.** In IOPB chromosome number reports LXXVII. Taxon 31: 763-764.
- Vij, S. P., N. Shekhar & R. Kuthiala 1982.** In: IOPB chromosome number reports LXXVII. Taxon 31: 769.
- Wang, Jenn-che 1996.** The systematic study of Taiwanese *Arisaema* (Araceae). Botanical Bulletin of Academia Sinica 37: 61-87.

- Wang, Z.-X. & Z.-S. Peng 2000.** Genetic analysis of male gamete abortion in *Pinellia ternate*. *Acta Agronomica Sinica* 26: 83-86.
- Watanabe, K., T. Kobayashi & J. Marata 1998.** Cytology and systematics in Japanese *Arisaema* (Araceae). *Journal of Plant Research* 111: 509-521.
- Yao, J.-L., R. E. Rowland & D. Cohen 1994.** Karyotype studies in the genus *Zantedeschia* (Araceae). *South African Journal of Botany* 60: 4-7.
- Yi, T.-S., Li, H., Li, D.-Z. 2005.** Chromosome variation in the genus *Pinellia* (Araceae) in China and Japan. *Bot. J. Linnean Soc.* 147: 449-455.
- Zheng, S.-Q. & K.-Y. Liu 1989.** Preliminary studies on chromosome band patterns and karyotypes of *Amorphophallus*. *J. Hunan Agric. Coll.* 15: 71-76.
- Zhin-Ling, D., Shao-Tian, C., Yun-Heng, J., Heng, L. 2007.** *Typhonium baoshanense* Z. L. Dao & H. Li, a new species of Araceae from western Yunnan, China. *Acta Phytotaxon. Sin.* 45: 234-238.
- Zhoglang, W., Heng, L., Fuhua, B. 2002.** *Typhonium jinpingense*, a new species from Yunnan, China, with the lowest diploid chromosome number in Araceae. *Novon* 12: 286-289.
